# Supplementary material for: Multi-Omic, Histopathologic, and Clinicopathologic Effects of Once-Weekly Oral Rapamycin in a Naturally Occurring Feline Model of Hypertrophic Cardiomyopathy: A Pilot Study
Source: MDPI journal article supplement (doi:10.3390/ani13203184), 2023-10-12
Supplement: s1 [file s1]

**SUPPLEMENTAL TABLES**

| <i>Subject</i> | <b>A31P Genotype</b> | <b>Disease Status</b> | <b>Treatment Group</b> | <b>Given Dose</b> | <b>Sex</b> | <b>Age</b> |
|----------------|----------------------|-----------------------|------------------------|-------------------|------------|------------|
| <i>Cat 1</i>   | Heterozygous         | HCM ACVIM stage B1    | HCM control            | -                 | M          | 9.99       |
| <i>Cat 2</i>   | Wildtype             | HCM ACVIM stage B1    | HCM control            | -                 | M          | 9.97       |
| <i>Cat 3</i>   | Heterozygous         | HCM ACVIM stage B1    | HCM control            | -                 | M          | 11.11      |
| <i>Cat 4</i>   | Heterozygous         | HCM ACVIM stage B1    | High-Dose              | 0.24mg/kg         | M          | 1.92       |
| <i>Cat 5</i>   | Homozygous           | HCM ACVIM stage B1    | High-Dose              | 0.31mg/kg         | M          | 1.87       |
| <i>Cat 6</i>   | Homozygous           | HCM ACVIM stage B1    | High-Dose              | 0.30mg/kg         | F          | 1.47       |
| <i>Cat 7</i>   | Homozygous           | HCM ACVIM stage B1    | Low-Dose               | 0.13mg/kg         | F          | 3.39       |
| <i>Cat 8</i>   | Homozygous           | HCM ACVIM stage B1    | Low-Dose               | 0.13mg/kg         | M          | 1.47       |
| <i>Cat 9</i>   | Homozygous           | HCM ACVIM stage B1    | Low-Dose               | 0.15mg/kg         | F          | 1.67       |

Supplemental Table S1. Subject information and affection status. The *MYBPC3* A31P genotype, disease status, treatment allocation, DR rapamycin dose, sex, and age for each cat used in this study are presented.

Abbreviations: *MYBPC3* = *myosin-binding protein C3*, DR = delayed-release, HCM = hypertrophic cardiomyopathy, ACVIM = American college of veterinary internal medicine.

| <i><b>Event</b></i>                      | <b>Screening</b> | <b>Day 0</b> | <b>Day 1-55; 57, 58, 59</b> | <b>Day 56</b> | <b>Day 60</b> | <b>Post In-Life</b> |
|------------------------------------------|------------------|--------------|-----------------------------|---------------|---------------|---------------------|
| <i>Physical Exam</i>                     | <b>X</b>         |              |                             | <b>X</b>      |               |                     |
| <i>Echocardiogram</i>                    | <b>X</b>         |              |                             | <b>X</b>      |               |                     |
| <i>Electrocardiogram</i>                 | <b>X</b>         |              |                             | <b>X</b>      |               |                     |
| <i>Clinical Pathology</i>                | <b>X</b>         |              |                             | <b>X</b>      |               |                     |
| <i>Urinalysis</i>                        | <b>X</b>         |              |                             | <b>X</b>      |               |                     |
| <i>Blood Collection (Proteomics)</i>     | <b>X</b>         |              |                             | <b>X</b>      |               |                     |
| <i>Urine Collection (Proteomics)</i>     | <b>X</b>         |              |                             | <b>X</b>      |               |                     |
| <i>Randomization</i>                     |                  | <b>X</b>     |                             |               |               |                     |
| <i>Weekly Dosing</i>                     |                  | <b>X</b>     | <b>X</b>                    | <b>X</b>      |               |                     |
| <i>Body Weight</i>                       | <b>X</b>         |              |                             | <b>X</b>      | <b>X</b>      | <b>X</b>            |
| <i>Daily Observations</i>                |                  |              | <b>X</b>                    |               |               |                     |
| <i>Euthanasia</i>                        |                  |              |                             |               | <b>X</b>      |                     |
| <i>Necropsy</i>                          |                  |              |                             |               | <b>X</b>      |                     |
| <i>Proteomics &amp; RNA-Seq Analysis</i> |                  |              |                             |               |               | <b>X</b>            |

Supplemental Table S2. Study design and schedule of events. Events for each study timepoint are presented.

| <i>Subject</i>           | <i>Treatment Group</i> | <i>Age (yrs)</i> | <i>Screening BW (kg)</i> | <i>Day 56 BW (kg)</i> |       | <i>Screening HR</i> | <i>Day 56 HR</i> |      | <i>Screening RR</i> | <i>Day 56 RR</i> |      | <i>Screening BP</i> | <i>Day 56 BP</i> |      |
|--------------------------|------------------------|------------------|--------------------------|-----------------------|-------|---------------------|------------------|------|---------------------|------------------|------|---------------------|------------------|------|
| <i>Cat 1</i>             | HCM                    | 9.99             |                          | 5.7                   |       |                     | 238              |      |                     |                  |      |                     | WNL              |      |
| <i>Cat 2</i>             | HCM                    | 9.97             |                          | 7.5                   |       |                     | 245              |      |                     |                  |      |                     | WNL              |      |
| <i>Cat 3</i>             | HCM                    | 11.11            |                          | 4.61                  |       |                     | 172              |      |                     |                  |      |                     | WNL              |      |
| <i>Cat 4</i>             | High-Dose              | 1.92             | 6.39                     | 6.74                  | 0.25  | 132                 | 190              | 1    | 20                  | 50               | 0.75 | 86                  | 126              | 0.25 |
| <i>Cat 5</i>             | High-Dose              | 1.87             | 4.96                     | 5.04                  |       | 168                 | 180              |      | 20                  | 34               |      | 99                  | 102              |      |
| <i>Cat 6</i>             | High-Dose              | 1.47             | 2.7                      | 2.89                  |       | 216                 | 130              |      | 48                  | 32               |      | 121                 | 128              |      |
| <i>Cat 7</i>             | Low-Dose               | 3.39             | 5.34                     | 5.64                  | 0.25  | 208                 | 170              | 0.25 | 28                  | 36               | 0.75 | 120                 | 111              | 1    |
| <i>Cat 8</i>             | Low-Dose               | 1.47             | 5.15                     | 5.46                  |       | 208                 | 150              |      | 56                  | 40               |      | 97                  | 112              |      |
| <i>Cat 9</i>             | Low-Dose               | 1.67             | 2.78                     | 2.93                  |       | 168                 | 150              |      | 48                  | 40               |      | 95                  | 95               |      |
| <i>Pooled Statistics</i> |                        | 1.77(1.47-3.39)  | 5.06(2.70-6.39)          | 5.25(2.89-6.74)       | 0.03* | 188 (132-216)       | 160(130-190)     | 0.34 | 38(20-56)           | 38(32-50)        | 1    | 98(86-121)          | 112(95-128)      | 0.31 |

Supplemental Table S3. Age and physical exam findings. Descriptive statistics for age and pertinent physical exam variables are provided for all cats used in this study at available time points. For the HCM control group (Cat 1, 2, and 3) the blood pressure was deemed within normal limits as a component of a prior study through confirmation of a Doppler systolic blood pressure <160mmHg, no evidence of abnormality on fundic examination, and no evidence of renal disease via routine serum biochemical profile. Blood pressure and respiratory rate were not recorded for the purposes of this study in the HCM control group. Results from a Wilcoxon matched-pairs signed rank test between pre- (Screening) and post-treatment (Day 56) variables are presented for individual treatment groups (low- or high-dose) as well as for pooled treatment groups (low- + high-dose); only BW was statistically significant between timepoints in the pooled comparison. \* $P<0.05$ .

Abbreviations: yrs = years, BW = bodyweight, kg = kilogram, HR = heart rate, RR = respiration rate, BP = blood pressure, WNL = within normal limits.

| <i>Subject</i>           | <i>Treatment Group</i> | <i>Screening Crystals</i> | <i>Day 56 Crystals</i> |      | <i>Screening pH</i> | <i>Day 56 pH</i> |      | <i>Screening [Protein]</i> | <i>Day 56 [Protein]</i> |      | <i>Screening Specific Gravity</i> | <i>Day 56 Specific Gravity</i> |      | <i>Screening WBC</i> | <i>Day 56 WBC</i> |   |
|--------------------------|------------------------|---------------------------|------------------------|------|---------------------|------------------|------|----------------------------|-------------------------|------|-----------------------------------|--------------------------------|------|----------------------|-------------------|---|
| <i>Cat 4</i>             | High-Dose              | 2                         | 0                      | 1    | 7.5                 | 7.0              | 0.50 | 0                          | 1                       | 0.50 | 1.048                             | 1.041                          | 0.75 | 2                    | 2                 | 1 |
| <i>Cat 5</i>             | High-Dose              | 1                         | 5                      |      | 7.0                 | 7.0              |      | 1                          | 1                       |      | 1.055                             | 1.058                          |      | 2                    | 2                 |   |
| <i>Cat 6</i>             | High-Dose              | 1                         | 0                      |      | 7                   | 6.5              |      | 0                          | 1                       |      | 1.059                             | 1.058                          |      | 2                    | 5                 |   |
| <i>Cat 7</i>             | Low-Dose               | 2                         | 1                      | 1    | 7.5                 | 6.0              | 0.50 | 0                          | 0                       | 1    | 1.044                             | 1.056                          | 0.25 | 2                    | 2                 | 1 |
| <i>Cat 8</i>             | Low-Dose               | 1                         | 0                      |      | 8.0                 | 6.0              |      | 1                          | 1                       |      | 1.034                             | 1.070                          |      | 2                    | 2                 |   |
| <i>Cat 9</i>             | Low-Dose               | 0                         | 1                      |      | 6.5                 | 6.5              |      | 1                          | 1                       |      | 1.053                             | 1.056                          |      | 2                    | 2                 |   |
| <i>Pooled Statistics</i> |                        |                           |                        | 0.78 |                     |                  | 0.13 |                            |                         | 0.50 |                                   |                                | 0.31 |                      |                   | 1 |

Supplemental Table S4. Urinalysis findings on rapamycin-treated cats. Results from urinalysis of HCM cats receiving low- or high-dose DR rapamycin are presented. Results from a Wilcoxon matched-pairs signed rank test between pre- (Screening) and post-treatment (Day 56) variables are presented for individual treatment groups (low- or high-dose) as well as for pooled treatment groups (low- + high-dose); no statistically significant variables between timepoints were found in any of the comparisons. \* $P < 0.05$ . Abbreviations: HCM = hypertrophic cardiomyopathy, DR = delayed-release, WBC= white blood cell.



| Subject           | Treatment Group | Screening ALT | Day 56 ALT  |      | Screening Bicarbonate | Day 56 Bicarbonate |       | Screening BUN | Day 56 BUN |      | Screening Creatinine | Day 56 Creatinine |      | Screening Fructosamine | Day 56 Fructosamine |      | Screening Glucose | Day 56 Glucose |      | Screening NTproBNP | Day 56 NTproBNP |      | Screening SDMA | Day 56 SDMA |      | Screening T4 | Day 56 T4   |      |
|-------------------|-----------------|---------------|-------------|------|-----------------------|--------------------|-------|---------------|------------|------|----------------------|-------------------|------|------------------------|---------------------|------|-------------------|----------------|------|--------------------|-----------------|------|----------------|-------------|------|--------------|-------------|------|
| Cat 4             | High-Dose       | 40            | 60          | 0.75 | 21                    | 20                 | 0.25  | 21            | 20         | 0.50 | 1.3                  | 1.1               | 0.25 | 193                    | 209                 | 0.50 | 80                | 94             | 0.75 | 24                 | 55              | 0.75 | 18             | 13          | 0.75 | 1.9          | 2.2         | 0.25 |
| Cat 5             | High-Dose       | 54            | 63          |      | 21                    | 19                 |       | 21            | 19         |      | 1.3                  | 1.0               |      | 190                    | 185                 |      | 100               | 84             |      | 1500               | 1426            |      | 13             | 11          |      | 2.0          | 2.4         |      |
| Cat 6             | High-Dose       | 82            | 67          |      | 17                    | 15                 |       | 23            | 23         |      | 1.1                  | 1.0               |      | 184                    | 191                 |      | 68                | 97             |      | 1070               | 1500            |      | 9              | 11          |      | 2.5          | 2.6         |      |
| Cat 7             | Low-Dose        | 36            | 33          | 0.50 | 18                    | 17                 | 0.25  | 19            | 19         | 1    | 1.1                  | 0.9               | 0.50 | 182                    | 169                 | 0.25 | 94                | 88             | 0.50 | 124                | 106             | 0.50 | 14             | 12          | 1    | 2.9          | 1.9         | 0.25 |
| Cat 8             | Low-Dose        | 35            | 55          |      | 18                    | 17                 |       | 18            | 22         |      | 1.0                  | 0.9               |      | 219                    | 174                 |      | 103               | 112            |      | 774                | 1353            |      | 5              | 9           |      | 1.4          | 1.0         |      |
| Cat 9             | Low-Dose        | 62            | 82          |      | 15                    | 14                 |       | 26            | 20         |      | 1.3                  | 1.3               |      | 199                    | 184                 |      | 97                | 158            |      | 123                | 179             |      | 16             | 12          |      | 2.0          | 1.8         |      |
| Pooled Statistics |                 | 47(35-82)     | 61.5(33-82) | 0.19 | 18(15-21)             | 17(14-20)          | 0.03* | 21(18-26)     | 20(19-23)  | 0.63 | 1.2(1-1.3)           | 1(0.9-1.3)        | 0.06 | 191.5(182-219)         | 184.5(169-209)      | 0.56 | 95.5(68-103)      | 95.5(84-158)   | 0.31 | 449(24-1500)       | 766(55-1500)    | 0.31 | 13.5(5-18)     | 11.5(9-13)  | 0.53 | 2(1.4-2.9)   | 2.05(1-2.6) | 0.72 |

Supplemental Table S5. Biochemistry findings on rapamycin-treated cats. Results from pertinent biochemistry measures of HCM cats receiving low- or high-dose DR rapamycin are presented. Results from a Wilcoxon matched-pairs signed rank test between pre- (Screening) and post-treatment (Day 56) variables are presented for individual treatment groups (low- or high-dose) as well as for pooled treatment groups (low- + high-dose); only bicarbonate/total CO<sub>2</sub> measures were statistically significant between timepoints in the pooled comparison. \* $P < 0.05$ .

Abbreviations: HCM = hypertrophic cardiomyopathy, DR = delayed-release, ALT = alanine transaminase, BUN = blood urea nitrogen, NTproBNP = N-terminal prohormone of brain natriuretic peptide, SDMA = symmetric dimethylarginine, T4 = total thyroxine.

| Subject           | Treatment Group | Screening [EOS] | Day 56 [EOS]   |      | Screening HCT (%) | Day 56 HCT (%)  |      | Screening [HGB] | Day 56 [HGB]    |      | Screening [LYMPH] | Day 56 [LYMPH]  |      | Screening MCH   | Day 56 MCH      |      | Screening MCV | Day 56 MCV  |      | Screening [MONO] | Day 56 [MONO] |      | Screening [NEUT] | Day 56 [NEUT]   |      | Screening [Platelet] | Day 56 [Platelet] |      | Screening [RBC]  | Day 56 [RBC]     |      | Screening [WBC] | Day 56 [WBC]   |      |
|-------------------|-----------------|-----------------|----------------|------|-------------------|-----------------|------|-----------------|-----------------|------|-------------------|-----------------|------|-----------------|-----------------|------|---------------|-------------|------|------------------|---------------|------|------------------|-----------------|------|----------------------|-------------------|------|------------------|------------------|------|-----------------|----------------|------|
| Cat 4             | High-Dose       | 800             | 959            | 0.50 | 30.0              | 44.2            | 0.25 | 9.7             | 15.2            | 0.25 | 1950              | 3128            | 1    | 14.3            | 14.6            | 0.75 | 44            | 42          | 0.50 | 50               | 140           | 0.50 | 2200             | 3565            | 0.25 | 359                  | 141               | 1    | 6.76             | 10.42            | 0.25 | 5.0             | 7.8            | 0.25 |
|                   |                 |                 |                |      |                   |                 |      |                 |                 |      |                   |                 |      |                 |                 |      |               |             |      |                  |               |      |                  |                 |      |                      |                   |      |                  |                  |      |                 |                |      |
|                   | High-Dose       | 686             | 393            |      | 30.3              | 41.1            |      | 10.5            | 13.7            |      | 5684              | 6747            |      | 14.1            | 13.9            |      | 41            | 42          |      | 196              | 288           |      | 3234             | 5672            |      | 252                  | 232               |      | 7.43             | 9.86             |      | 9.8             | 13.1           |      |
| Cat 6             | High-Dose       | 750             | 323            |      | 30                | 39.5            |      | 9.9             | 13.8            |      | 3450              | 1856            |      | 14.1            | 13.4            |      | 43            | 39          |      | 300              | 277           |      | 3000             | 5244            |      | 33                   | 328               |      | 7.04             | 10.27            |      | 7.5             | 7.7            |      |
| Cat 7             | Low-Dose        | 258             | 148            | 1    | 44.0              | 29.7            | 0.25 | 13.7            | 10.4            | 0.25 | 2387              | 1685            | 0.75 | 14.6            | 14.2            | 0.50 | 47            | 41          | 0.75 | 170              | 159           | 0.75 | 3978             | 3307            | 0.75 | 358                  | 211               | 0.75 | 9.36             | 7.33             | 0.50 | 6.8             | 5.3            | 0.75 |
|                   |                 |                 |                |      |                   |                 |      |                 |                 |      |                   |                 |      |                 |                 |      |               |             |      |                  |               |      |                  |                 |      |                      |                   |      |                  |                  |      |                 |                |      |
|                   | Low-Dose        | 283             | 441            |      | 50.0              | 33.2            |      | 15.7            | 11.8            |      | 2707              | 2608            |      | 13.5            | 13.5            |      | 43            | 38          |      | 707              | 290           |      | 16503            | 9261            |      | 139                  | 91                |      | 11.62            | 8.76             |      | 20.2            | 12.6           |      |
| Cat 9             | Low-Dose        | 476             | 356            |      | 45.0              | 41.1            |      | 14.1            | 13.6            |      | 1768              | 2261            |      | 14.5            | 13.9            |      | 46            | 42          |      | 136              | 249           |      | 4352             | 6034            |      | 27                   | 151               |      | 9.70             | 9.75             |      | 6.8             | 8.9            |      |
| Pooled Statistics |                 | 581(256-800)    | 374.5(148-959) | 0.56 | 37.15(30-50)      | 40.3(29.7-44.2) | 0.84 | 12.1(8.7-15.7)  | 13.6(10.4-15.2) | 0.72 | 2547(1768-5684)   | 2439(1685-6747) | 1    | 14.2(13.5-14.6) | 13.9(13.4-14.6) | 0.19 | 43.5(41-47)   | 41.5(38-42) | 0.06 | 183(50-707)      | 263(140-290)  | 0.84 | 3608(2360-16503) | 5438(3307-9261) | 0.56 | 195.5(27-359)        | 181(91-328)       | 0.84 | 8.39(6.76-11.62) | 9.80(5.73-10.42) | 0.44 | 7.1(5-20.2)     | 8.35(5.3-13.1) | 0.69 |

Supplemental Table S6. Hematology findings on rapamycin-treated cats. Results from pertinent hematology measures of HCM cats receiving low- or high-dose DR rapamycin are presented. Results from a Wilcoxon matched-pairs signed rank test between pre- (Screening) and post-treatment (Day 56) variables are presented for individual treatment groups (low- or high-dose) as well as for pooled treatment groups (low- + high-dose); no statistically significant variables between timepoints were found in any of the comparisons. \* $P < 0.05$ .

Abbreviations: HCM = hypertrophic cardiomyopathy, DR = delayed-release, [EOS] = eosinophil concentration, HCT = hematocrit, [HGB] = hemoglobin concentration, [LYMPH] = lymphocyte concentration, MCH = mean corpuscular hemoglobin, MCV = mean corpuscular volume, [MONO] = monocyte concentration, [NEUT] = neutrophil concentration, [RBC] = red blood cell concentration, [WBC] = white blood cell concentration.

| <b>Subjects</b> | <b>Treatment Group</b> | <b>LVEF</b> | <b>MD</b> | <b>CH</b> | <b>IF</b> | <b>CVR</b> | <b>CVN</b> | <b>NSPC</b> |
|-----------------|------------------------|-------------|-----------|-----------|-----------|------------|------------|-------------|
| <i>Cat 1</i>    | HCM                    | 1           | 1         | 1         | 1         | 1          | 1          | 11          |
| <i>Cat 2</i>    | HCM                    | 2           | 2         | 1         | 0         | 3          | 0          | 9           |
| <i>Cat 3</i>    | HCM                    | 2           | 1         | 1         | 1         | 1          | 1          | 6           |
| <i>Cat 4</i>    | High-Dose              | 3           | 1         | 1         | 0         | 0          | 1          | 5           |
| <i>Cat 5</i>    | High-Dose              | 2           | 3         | 2         | 0         | 1          | 1          | 4           |
| <i>Cat 6</i>    | High-Dose              | 3           | 2         | 2         | 1         | 1          | 1          | 5           |
| <i>Cat 7</i>    | Low-Dose               | 2           | 1         | 1         | 0         | 1          | 1          | 6           |
| <i>Cat 8</i>    | Low-Dose               | 3           | 2         | 3         | 2         | 1          | 1          | 3           |
| <i>Cat 9</i>    | Low-Dose               | 2           | 1         | 2         | 1         | 1          | 1          | 6           |
| <i>P-value</i>  |                        | 0.36        | 0.68      | 0.36      | 0.87      | 0.75       | 1          | 0.11        |

Supplemental Table S7. Histopathologic findings for treatment and HCM control cats. Histopathologic scores from HCM control and DR-rapamycin-treated cats are presented. Results from a Kruskal-Wallis test followed by Dunn's multiple comparisons correction are reported; no statistically significant variables between and within groups were identified. \* $P < 0.05$ . Abbreviations: HCM = hypertrophic cardiomyopathy, DR = delayed release, LVEF = left ventricular endocardial fibrosis, MD = myocardial disarray, CH = cellular hypertrophy, IF = interstitial fibrosis, CVR = coronary vessel remodeling, CVN = coronary vessel narrowing, NSPC = number of perimysial collagen.

| Subject           | Treatment Group | Screening RPSA Lx/Ao | Day 56 RPSA Lx/Ao | Screening RPLA Lx | Day 56 RPLA Lx  | Screening IVSd Max | Day 56 IVSd Max | Screening LVPWd Max | Day 56 LVPWd Max | Screening LVIDd Sx | Day 56 LVIDd Sx | Screening LVIDs Sx | Day 56 LVIDs Sx | Screening FS%  | Day 56 FS%      | Screening LVOT maxPG | Day 56 LVOT maxPG | Screening LAF   | Day 56 LAF | Screening MWT | Day 56 MWT    |     |                |                 |     |                   |                    |     |                 |                 |     |
|-------------------|-----------------|----------------------|-------------------|-------------------|-----------------|--------------------|-----------------|---------------------|------------------|--------------------|-----------------|--------------------|-----------------|----------------|-----------------|----------------------|-------------------|-----------------|------------|---------------|---------------|-----|----------------|-----------------|-----|-------------------|--------------------|-----|-----------------|-----------------|-----|
| Cat 1             | HCM             |                      | 1.48              |                   | 1.43            |                    | 6.46            |                     | 5.57             |                    | 1.42            |                    | 0.40            |                | 71.5            |                      | 5.10              |                 | 57.0       |               | 6.46          |     |                |                 |     |                   |                    |     |                 |                 |     |
| Cat 2             | HCM             |                      | 1.18              |                   | 1.25            |                    | 7.10            |                     | 6.17             |                    | 1.29            |                    | 0.33            |                | 74.6            |                      | 7.73              |                 | 31.59      |               | 7.10          |     |                |                 |     |                   |                    |     |                 |                 |     |
| Cat 3             | HCM             |                      | 1.31              |                   | 1.46            |                    | 6.55            |                     | 5.70             |                    | 1.34            |                    | 0.73            |                | 45.2            |                      | 1.59              |                 | 70.2       |               | 6.55          |     |                |                 |     |                   |                    |     |                 |                 |     |
| Cat 4             | High-Dose       | 1.87                 | 1.5               | 1                 | 1.59            | 1.43               | 1               | 6.93                | 7.18             | 0.5                | 6.49            | 5.2                | 1               | 1.47           | 1.73            | 0.8                  | 0.72              | 0.91            | 0.5        | 51            | 47.4          | 0.3 | 2.36           | 2.41            | 0.3 | 56.07             | 52.66              | 0.8 | 6.93            | 7.18            | 0.3 |
| Cat 5             | High-Dose       | 1.34                 | 1.58              |                   | 1.31            | 1.69               |                 | 6.04                | 6.92             |                    | 7.71            | 8.24               |                 | 1.27           | 1.3             |                      | 0.42              | 0.56            |            | 67            | 56.9          |     | 2.33           | 3.22            |     | 42.2              | 70.58              |     | 7.71            | 8.24            |     |
| Cat 6             | High-Dose       | 1.36                 | 1.52              |                   | 1.31            | 1.06               |                 | 7.11                | 9.97             |                    | 6.41            | 7.24               |                 | 1.26           | 1.09            |                      | 0.43              | 0.41            |            | 65.5          | 62            |     | 3.08           | 3.55            |     | 74.55             | 38.82              |     | 7.11            | 7.24            |     |
| Cat 7             | Low-Dose        | 1.1                  | 1.34              | 0.8               | 1.28            | 1.08               | 0.8             | 6.67                | 6.61             | 0.8                | 4.42            | 4.7                | 0.8             | 1.43           | 1.28            | 0.5                  | 0.52              | 0.69            | 1          | 63.4          | 46.2          | 1   | 2.8            | 1.28            | 0.3 | 83.38             | 37.98              | 0.5 | 6.67            | 6.61            | 0.3 |
| Cat 8             | Low-Dose        | 1.42                 | 1.44              |                   | 1.34            | 1.94               |                 | 8.54                | 7.3              |                    | 8.13            | 7.85               |                 | 1.5            | 1.26            |                      | 0.47              | 0.33            |            | 68.3          | 73.7          |     | 4.5            | 4.23            |     | 43.23             | 58.67              |     | 8.54            | 7.85            |     |
| Cat 9             | Low-Dose        | 1.59                 | 1.41              |                   | 1.22            | 1.24               |                 | 4.74                | 5.71             |                    | 6.05            | 5.04               |                 | 1.01           | 1.08            |                      | 0.49              | 0.48            |            | 50.8          | 55.8          |     | 3.19           | 0.75            |     | 75.44             | 34.59              |     | 6.05            | 5.71            |     |
| Pooled Statistics |                 | 1.45(1.1-1.87)       | 1.47(1.34-1.58)   | 0.8               | 1.34(1.22-1.59) | 1.41(1.06-1.94)    | 0.8             | 6.67(4.74-8.54)     | 7.28(5.71-9.97)  | 0.8                | 6.54(4.42-8.13) | 6.38(4.7-8.24)     | 0.7             | 1.32(1.01-1.5) | 1.28(1.08-1.73) | 0.8                  | 0.51(0.42-0.72)   | 0.56(0.33-0.91) | 0.5        | 61(50.8-68.3) | 57(46.2-73.7) | 0.6 | 3.04(2.33-4.5) | 2.57(0.75-4.23) | 0.7 | 62.48(42.2-83.38) | 48.88(34.5-97.058) | 0.3 | 7.17(6.05-8.54) | 7.14(5.71-8.24) | 1   |

Supplemental Table S8. Echocardiographic findings for treatment cats. Results from echocardiographic measures of HCM cats receiving low- or high-dose DR rapamycin are presented. Results from a Wilcoxon matched-pairs signed rank test between pre- (Screening) and post-treatment (Day 56) variables are presented for individual treatment groups (low- or high-dose) as well as for pooled treatment groups (low- + high-dose); no statistically significant variables between timepoints were found in any of the comparisons. Raw values from the control HCM group are provided; descriptive statistics and statistical comparisons for the control group were not performed as no Day 56 is available.

Abbreviations: RPSA = right parasternal short-axis, RPLA = right parasternal long-axis, LA/Ao = left atrial to aortic root diameter, LA = left atrial diameter (cm), IVSd = interventricular septum diameter in diastole (mm), LVPWd Max = maximum left ventricular posterior wall diameter in diastole (mm), LVIdd = left ventricular internal diameter in diastole (cm), LVIDs = left ventricular internal diameter in systole (cm), Sx = short-axis, FS% = percent fractional shortening, LVOT maxPG = left ventricular outflow tract maximum pressure gradient (mmHg), LAF = left auricular flow velocity (cm/s), MWT = maximal wall thickness (mm).

| <b>Comparison</b>                | <b>Downregulated</b>                            | <b>Upregulated</b>                              |
|----------------------------------|-------------------------------------------------|-------------------------------------------------|
| <b><i>Low-Dose* vs HCM</i></b>   | <i>ECRG4, P2RX1, TAAR1</i><br>(n=3)             | <i>DCLK1, KERA, MYL1, VTN</i><br>(n=4)          |
| <b><i>High-Dose* vs HCM</i></b>  | <i>AS3MT, FAM177B, HSD17B8, PPDPFL</i><br>(n=4) | <i>CNGA1, FREM1, GRAP2, ITGB8, KIT</i><br>(n=5) |
| <b><i>All Doses* vs HCM</i></b>  | -<br>(n=0)                                      | <i>FBLN5, FREM1, ITGB8</i><br>(n=3)             |
| <b><i>Low-* vs High-Dose</i></b> | -<br>(n=0)                                      | <i>DIPK1A</i><br>(n=1)                          |

Supplemental Table S9. Shared down- and upregulated DEGs between LV and IVS tissues. Total number of shared DEGs between LV and IVS tissues are presented for each group comparison. \*Down-/upregulation was assigned respective to the asterisk-marked groups in the comparison column.

Abbreviations: HCM = hypertrophic cardiomyopathy, DEG = differentially expressed gene(s), LV = left ventricle, IVS = interventricular septum.



|                                |                                        |                                                                                                                                                                                                                                                                                                                                                                                                                                                                                                                                                                                                                                                                                                                                                                                                                                      |                |                                                                                                                                                                                                                                                                                                                                                                                                                                                                                                                                                                                                                                                                                                                                                                                                                                                                                                                                     |
|--------------------------------|----------------------------------------|--------------------------------------------------------------------------------------------------------------------------------------------------------------------------------------------------------------------------------------------------------------------------------------------------------------------------------------------------------------------------------------------------------------------------------------------------------------------------------------------------------------------------------------------------------------------------------------------------------------------------------------------------------------------------------------------------------------------------------------------------------------------------------------------------------------------------------------|----------------|-------------------------------------------------------------------------------------------------------------------------------------------------------------------------------------------------------------------------------------------------------------------------------------------------------------------------------------------------------------------------------------------------------------------------------------------------------------------------------------------------------------------------------------------------------------------------------------------------------------------------------------------------------------------------------------------------------------------------------------------------------------------------------------------------------------------------------------------------------------------------------------------------------------------------------------|
|                                | TBCB, TMEM161A, TSEN15, TWFI<br>(n=99) | RPL27A, RPL28, RPL30, RPL31, RPL32, RPL35A, RPL36, RPL39, RPL4, RPL7A, RPL8, RPS11, RPS12, RPS13, RPS15, RPS15A, RPS18, RPS18, RPS20, RPS21, RPS23, RPS24, RPS25, RPS27A, RPS6, RPS6KA3, RPS8, RRAD, RRBPI, RTN4, RUVBL2, S100A10, SAFB, SAR1A, SDCBP, SEC22B, SEMA3C, SEPTIN9, SERBP1, SERPINF1, SERPINH1, SF1, SF3B1, SGCD, SGTA, SH3GLB1, SIRT2, SLC2A1, SLC44A2, SLIRP, SMIM20, SNRNP70, SNRPC, SNRPDI, SNRPE, SORBS1, SORBS1, SORBS2, SORT1, SPARCL1, SPG7, SRPRA, SRSF1, SSPN, SSR4, STBD1, SUCLG2, SUN2, SVIL, SYNCRIP, SYNPO, SYNPO2L, TARS1, TBCA, TGFBI, TGM2, THBS4, TIMM29, TINAGL1, TLN2, TMED10, TMED2, TMEM11, TMX4, TNKS1BP1, TNXB, TOMM20, TOMM22, TRIM54, TRIM63, TRIP6, TSPAN9, TTN, TUBB, TUBB6, TXNDC5, U2AF1, UBE2L3, USP28, VASP, VCAN, VNN1, WASL, WDR61, WFS1, XIRP1, XIRP2, YBX1, ZMPSTE24, ZYX<br>(n=432) |                | RPS23, RPS24, RPS28, RPS3A, RPS5, RPS6, RPS6KA3, RPS8, RRAD, RRAGC, RRBPI, RSF1, RTN3, RUVBL2, S100A11, SAFB, SARS2, SBSPOP, SCN7A, SDCBP, SEC31A, SEC61A1, SELENOO, SEMA3C, SEPTIN1, SEPTIN8, SERBP1, SERPINC1, SF1, SFXN3, SH3GL1, SHC1, SIRT2, SLC20A2, SLC25A22, SLC25A3, SLC2A1, SLC30A9, SLC9A3R1, SMC1A, SMYD2, SNAP23, SNRNP200, SNRNP70, SNRPA1, SNRPDI, SNRPD3, SNRPE, SNX6, SOD3, SORBS1, SORBS2, SORT1, SPCS2, SRI, SRSF1, SSPN, ST13, STAT3, STBD1, STOML2, STRN3, SUGCT, SUN1, SUN2, SVIL, SYNCRIP, SYNE1, SYNPO, SYNPO2L, TARDBP, TBCB, TBRG4, TGFBI, THBD, THNSL1, TIMM29, TIMMDC1, TINAGL1, TIPRL, TLN2, TMED2, TMEM120A, TMEM201, TMPO, TNKS1BP1, TNPO1, TNPO2, TNXB, TOMM20, TOMM7, TRA2B, TRIM28, TRIM54, TRIM63, TRIP6, TUBB, TXNDC5, U2AF1, UAPIL1, UBA7, UBE2G2, UBXN1, UCHL5, UPF1, USP13, USP28, USP7, VAPB, VASP, VCAN, VDAC3, VLDLR, VNN1, VPS36, VTA1, WDR82, XIRP1, XIRP2, XPO7, YBX1, YBX3<br>(n=460) |
| Low- <sup>a</sup> vs High-Dose | -<br>(n=0)                             | FBP2, USP15<br>(n=2)                                                                                                                                                                                                                                                                                                                                                                                                                                                                                                                                                                                                                                                                                                                                                                                                                 | NADPH<br>(n=1) | AFP, PPM1K, ZBED8<br>(n=3)                                                                                                                                                                                                                                                                                                                                                                                                                                                                                                                                                                                                                                                                                                                                                                                                                                                                                                          |

Supplemental Table S10. Total global DAPs of LV and IVS tissues. Global LV and IVS DAPs of all study comparisons are reported. Bolded protein symbols represent shared DAPs between low-dose vs HCM and high-dose vs HCM comparisons per tissue type. All under- (log2FoldChange<-1) and overabundant (log2FoldChange>1) DAPs reported here were statistically significant ( $P$ -value<sub>adjusted</sub><0.05). \*Under-/overabundance was assigned respective to the asterisk-marked groups in the comparison column. Abbreviations: HCM = hypertrophic cardiomyopathy, DAP = differentially abundant peptide(s), LV = left ventricle, IVS = interventricular septum.

| <i>Comparison</i>                           | Plasma                                                      |                                    | Urine                                                                                                                                                                                                                                                                                                                                                                  |                                                                                                                                                                                                                                                                    |
|---------------------------------------------|-------------------------------------------------------------|------------------------------------|------------------------------------------------------------------------------------------------------------------------------------------------------------------------------------------------------------------------------------------------------------------------------------------------------------------------------------------------------------------------|--------------------------------------------------------------------------------------------------------------------------------------------------------------------------------------------------------------------------------------------------------------------|
|                                             | Underabundant                                               | Overabundant                       | Underabundant                                                                                                                                                                                                                                                                                                                                                          | Overabundant                                                                                                                                                                                                                                                       |
| <i>Low-Dose (pre) vs Low-Dose (post)*</i>   | -<br>(n=0)                                                  | -<br>(n=0)                         | ALDOB, AQP2, ATP1B1, ATP5F1B, B3GNT2, CDH11, COL18A1, CRYZ, FES, H2B, HSPA5, IL1RAP, ISLR, LOC101091370, LOC101098453, MYL1, NIT2, NUTF2, PGK1, PODXL, PPIA, PRSS53, PRSS8, RAB7A, SLC5A10, TREML1<br>(n=26)                                                                                                                                                           | ASGR1, FSTL3, NPC1L1, PRNP, VASN<br>(n=5)                                                                                                                                                                                                                          |
| <i>High-Dose (pre) vs High-Dose (post)*</i> | -<br>(n=0)                                                  | -<br>(n=0)                         | -<br>(n=0)                                                                                                                                                                                                                                                                                                                                                             | -<br>(n=0)                                                                                                                                                                                                                                                         |
| <i>All Doses (pre) vs All Doses (post)*</i> | ACE2, CXC, IGFBP7, LOC101080826, THBS1, TIMP2, VWF<br>(n=7) | APOA1, APOA4, APOC4, VNN1<br>(n=4) | AGA, AQP2, ARSA, B3GNT2, CD300LG, CD63, CHMP2B, CILP, CRYZ, EFNB2, FABP3, FES, GALC, GBA3, H2B, HAAO, IDH1, IGFBP1, IL1RAP, IL4R, ISLR, KCNJ15, LBP, LOC101091370, LRRC19, MTA2, NEU1, NUTF2, OLFM1, PBLD, PLA2G15, PMM2, PODXL, PPIA, PPIB, RAC1, RHBG, RRAS2, SELENBP1, SHISA7, SLC25A3, SLC3A1, SLC5A10, SORT1, SPON1, TMEM123, TREML1, TTN, TUBB, TUBB4B<br>(n=50) | AFM, ALB, ANGPTL2, ANGPTL3, ANXA6, APBB1, APOH, ASGR1, C4A, C4BPA, C4BPA, CD27, CD55, CFI, DSC1, ELANE, EPS8, FABP5, FBLN1, GC, GOLM1, GPR108, GSN, HRG, ICOSLG, ITIH4, KRT10, KRT18, KRT2, LACTB2, NPC1L1, PEAR1, PLG, PZP, SIAE, STC1, TF, VASN, WFDC2<br>(n=39) |



Supplemental Table S11. Total global DAPs of plasma and urine samples. Global plasma and urine DAPs of all study comparisons are reported. All under- ( $\log_2\text{FoldChange} < -1$ ) and overabundant ( $\log_2\text{FoldChange} > 1$ ) DAPs reported here were statistically significant ( $P\text{-value}_{\text{adjusted}} < 0.05$ ). \*Under-/overabundance was assigned respective to the asterisk-marked groups in the comparison column. Abbreviations: HCM = hypertrophic cardiomyopathy, DAP = differentially abundant peptide(s).

| <i>Method</i> | <b>Enrichment Analysis</b> |              |             | <b>Specimen</b> | <b>Comparison</b>     | <b>Regulation</b> |
|---------------|----------------------------|--------------|-------------|-----------------|-----------------------|-------------------|
| <i>LCMS</i>   | <b>GO CC</b>               | <b>GO BP</b> | <b>KEGG</b> | LV              | Low-Dose vs HCM       | UA                |
| <i>LCMS</i>   | <b>GO CC</b>               | <b>GO BP</b> | <b>KEGG</b> | LV              | Low-Dose vs HCM       | OA                |
| <i>LCMS</i>   | <b>GO CC</b>               | <b>GO BP</b> | <b>KEGG</b> | LV              | High-Dose vs HCM      | UA                |
| <i>LCMS</i>   | <b>GO CC</b>               | <b>GO BP</b> | <b>KEGG</b> | LV              | High-Dose vs HCM      | OA                |
| <i>LCMS</i>   | <b>GO CC</b>               | <b>GO BP</b> | <b>KEGG</b> | LV              | All Doses vs HCM      | UA                |
| <i>LCMS</i>   | <b>GO CC</b>               | <b>GO BP</b> | <b>KEGG</b> | LV              | All Doses vs HCM      | OA                |
| <i>LCMS</i>   | GO CC                      | GO BP        | KEGG        | LV              | Low- vs High-Dose     | UA                |
| <i>LCMS</i>   | GO CC                      | GO BP        | KEGG        | LV              | Low- vs High-Dose     | OA                |
| <i>LCMS</i>   | <b>GO CC</b>               | <b>GO BP</b> | <b>KEGG</b> | IVS             | Low-Dose vs HCM       | UA                |
| <i>LCMS</i>   | <b>GO CC</b>               | <b>GO BP</b> | <b>KEGG</b> | IVS             | Low-Dose vs HCM       | OA                |
| <i>LCMS</i>   | GO CC                      | GO BP        | <b>KEGG</b> | IVS             | High-Dose vs HCM      | UA                |
| <i>LCMS</i>   | <b>GO CC</b>               | <b>GO BP</b> | <b>KEGG</b> | IVS             | High-Dose vs HCM      | OA                |
| <i>LCMS</i>   | <b>GO CC</b>               | <b>GO BP</b> | <b>KEGG</b> | IVS             | All Doses vs HCM      | UA                |
| <i>LCMS</i>   | <b>GO CC</b>               | <b>GO BP</b> | <b>KEGG</b> | IVS             | All Doses vs HCM      | OA                |
| <i>LCMS</i>   | GO CC                      | GO BP        | KEGG        | IVS             | Low- vs High-Dose     | UA                |
| <i>LCMS</i>   | GO CC                      | GO BP        | KEGG        | IVS             | Low- vs High-Dose     | OA                |
| <i>LCMS</i>   | GO CC                      | GO BP        | KEGG        | Plasma          | Low-Dose Pre vs Post  | UA                |
| <i>LCMS</i>   | GO CC                      | GO BP        | KEGG        | Plasma          | Low-Dose Pre vs Post  | OA                |
| <i>LCMS</i>   | GO CC                      | GO BP        | KEGG        | Plasma          | High-Dose Pre vs Post | UA                |
| <i>LCMS</i>   | GO CC                      | GO BP        | KEGG        | Plasma          | High-Dose Pre vs Post | OA                |
| <i>LCMS</i>   | GO CC                      | GO BP        | KEGG        | Plasma          | All Doses Pre vs Post | UA                |
| <i>LCMS</i>   | <b>GO CC</b>               | <b>GO BP</b> | <b>KEGG</b> | Plasma          | All Doses Pre vs Post | OA                |
| <i>LCMS</i>   | GO CC                      | GO BP        | KEGG        | Urine           | Low-Dose Pre vs Post  | UA                |
| <i>LCMS</i>   | <b>GO CC</b>               | GO BP        | KEGG        | Urine           | Low-Dose Pre vs Post  | OA                |
| <i>LCMS</i>   | GO CC                      | GO BP        | KEGG        | Urine           | High-Dose Pre vs Post | UA                |
| <i>LCMS</i>   | GO CC                      | GO BP        | KEGG        | Urine           | High-Dose Pre vs Post | OA                |
| <i>LCMS</i>   | GO CC                      | GO BP        | KEGG        | Urine           | All Doses Pre vs Post | UA                |

|                |              |              |             |       |                       |    |
|----------------|--------------|--------------|-------------|-------|-----------------------|----|
| <i>LCMS</i>    | <b>GO CC</b> | GO BP        | KEGG        | Urine | All Doses Pre vs Post | OA |
| <i>RNA-Seq</i> | <b>GO CC</b> | <b>GO BP</b> | <b>KEGG</b> | LV    | Low-Dose vs HCM       | DR |
| <i>RNA-Seq</i> | <b>GO CC</b> | <b>GO BP</b> | <b>KEGG</b> | LV    | Low-Dose vs HCM       | UR |
| <i>RNA-Seq</i> | <b>GO CC</b> | <b>GO BP</b> | <b>KEGG</b> | LV    | High-Dose vs HCM      | DR |
| <i>RNA-Seq</i> | GO CC        | <b>GO BP</b> | KEGG        | LV    | High-Dose vs HCM      | UR |
| <i>RNA-Seq</i> | GO CC        | GO BP        | KEGG        | LV    | All Doses vs HCM      | DR |
| <i>RNA-Seq</i> | <b>GO CC</b> | <b>GO BP</b> | KEGG        | LV    | All Doses vs HCM      | UR |
| <i>RNA-Seq</i> | <b>GO CC</b> | <b>GO BP</b> | <b>KEGG</b> | LV    | Low- vs High-Dose     | DR |
| <i>RNA-Seq</i> | <b>GO CC</b> | <b>GO BP</b> | KEGG        | LV    | Low- vs High-Dose     | UR |
| <i>RNA-Seq</i> | GO CC        | GO BP        | <b>KEGG</b> | IVS   | Low-Dose vs HCM       | DR |
| <i>RNA-Seq</i> | <b>GO CC</b> | <b>GO BP</b> | KEGG        | IVS   | Low-Dose vs HCM       | UR |
| <i>RNA-Seq</i> | GO CC        | GO BP        | KEGG        | IVS   | High-Dose vs HCM      | DR |
| <i>RNA-Seq</i> | GO CC        | <b>GO BP</b> | KEGG        | IVS   | High-Dose vs HCM      | UR |
| <i>RNA-Seq</i> | GO CC        | GO BP        | KEGG        | IVS   | All Doses vs HCM      | DR |
| <i>RNA-Seq</i> | GO CC        | <b>GO BP</b> | <b>KEGG</b> | IVS   | All Doses vs HCM      | UR |
| <i>RNA-Seq</i> | GO CC        | GO BP        | KEGG        | IVS   | Low- vs High-Dose     | DR |
| <i>RNA-Seq</i> | GO CC        | GO BP        | KEGG        | IVS   | Low- vs High-Dose     | UR |

Supplemental Table S12. Total GO and KEGG term analyses on proteomic and transcriptomic comparisons. All possible cellular component and biological processes GO and KEGG pathway term analyses are listed (n=132). Results from identified enriched genes/proteins for proteomic (n=39) and transcriptomic (n=23) GO and/or KEGG term analyses are bolded. Abbreviations: LCMS = liquid mass spectrometry, GO = gene ontology, CC = cellular component, BP = biological processes, LV = left ventricle, IVS = interventricular septum, HCM = hypertrophic cardiomyopathy, UA = underabundant, OA = overabundant, DR = downregulated, UR = upregulated.

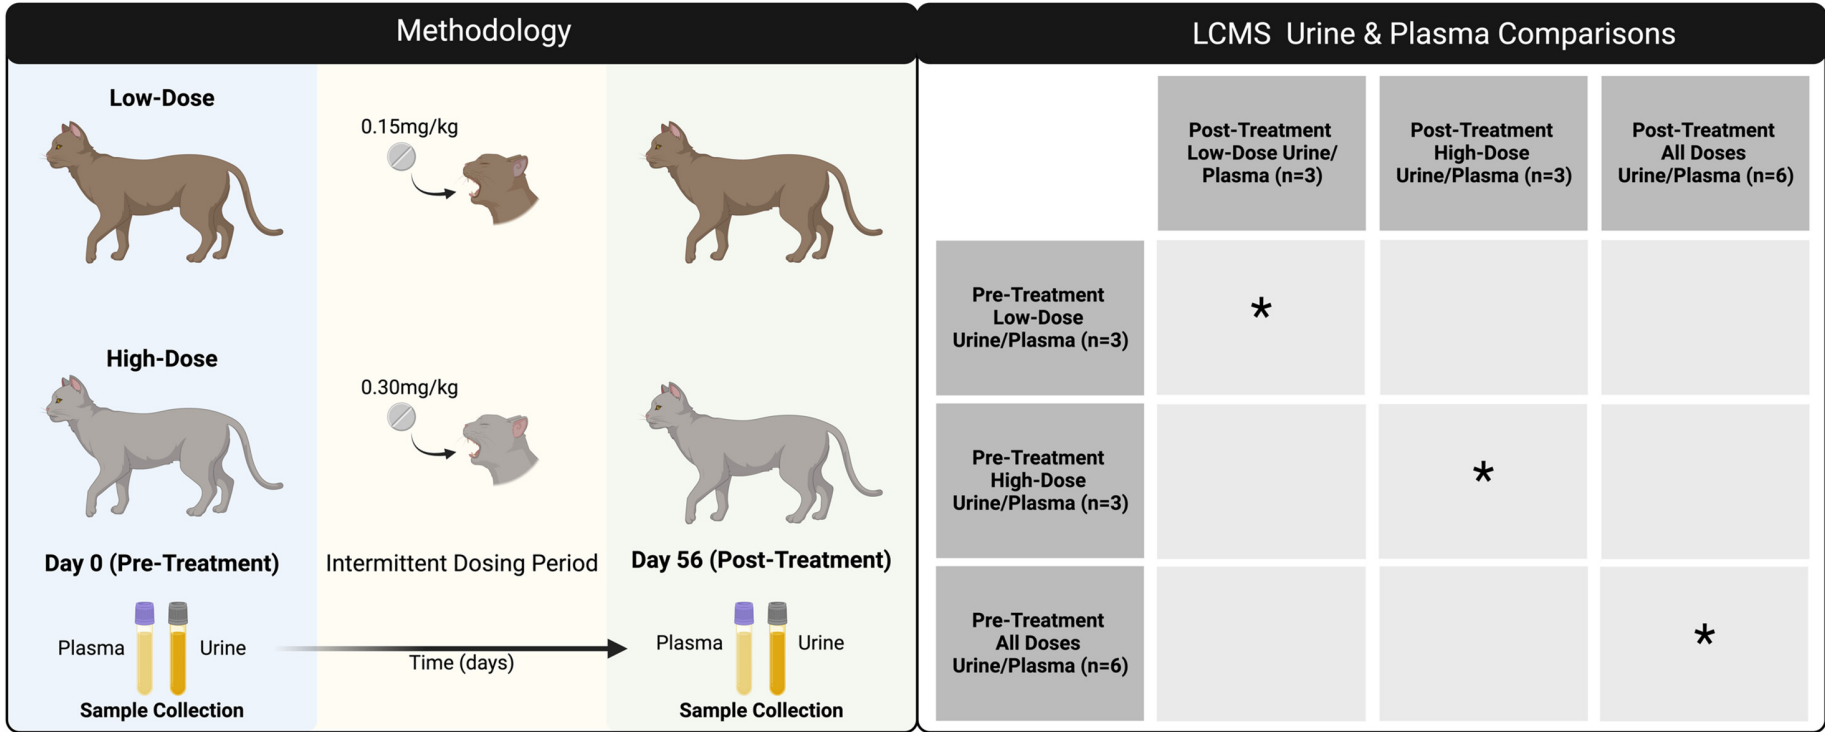

Supplemental Figure S1. Methodology and proteomic comparisons of pre- and post-treatment urine and plasma samples. Illustrative description of LCMS methods and sample collection specification are illustrated. LCMS proteomic comparisons between the pre- and post-treatment of low-, high-, and pooled all dose (low- & high-dose) groups are presented for urine and plasma samples. \*Asterisks in the above chart denote comparisons that were performed in this study.

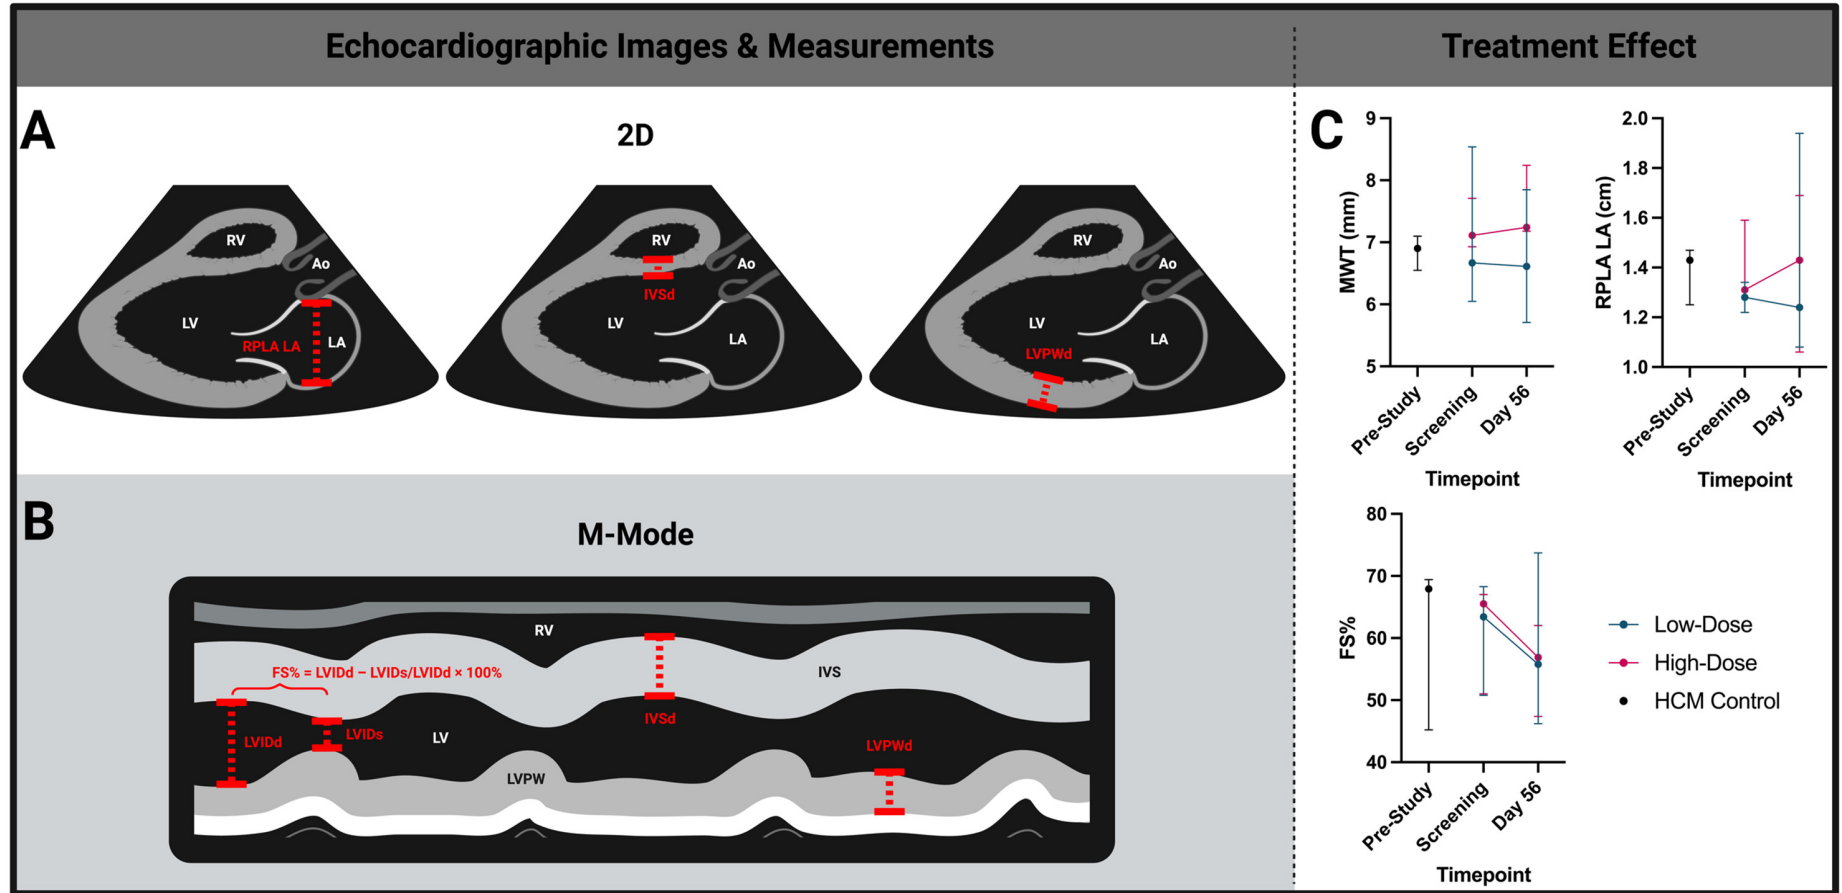

Supplemental Figure S2. Key echocardiographic measurements and treatment-related changes. Representative illustrations of echocardiographic images obtained in 2D right parasternal long-axis (A) and M-mode right parasternal short-axis (B) for the measurement of diastolic maximum wall thickness (MWT) from the IVSd or LVPWd, LA maximal diameter (RPLA LA), and percent LV fractional shortening (FS%) obtained from LV internal diameter measures in diastole and systole (LVIDd and LVIDs, respectively). Screening and Day 56 timepoint echocardiographic measurements are reported for HCM control (single timepoint pre-study) and low- and high-dose treated cats (for Screening and Day 56). In these graphs the median is shown with error bars representing the minimum and maximum values (C); note, the single echocardiographic assessment of untreated HCM controls shows that control cats were well-matched phenotypically to the treated cats.

Abbreviations: LV = left ventricle, RV = right ventricle, LA = left atrium, Ao = aorta, RPLA = right parasternal long-axis, RPLA LA = right parasternal long-axis LA diameter, IVS = interventricular septum, IVSd = diastolic interventricular septum thickness, LVPW = left ventricular posterior wall, LVPWd = diastolic left ventricular posterior wall thickness, FS% = percent fractional shortening, LVIDd = diastolic left ventricular internal diameter, LVIDs = systolic left ventricular internal diameter, MWT = maximum wall thickness, HCM = hypertrophic cardiomyopathy.

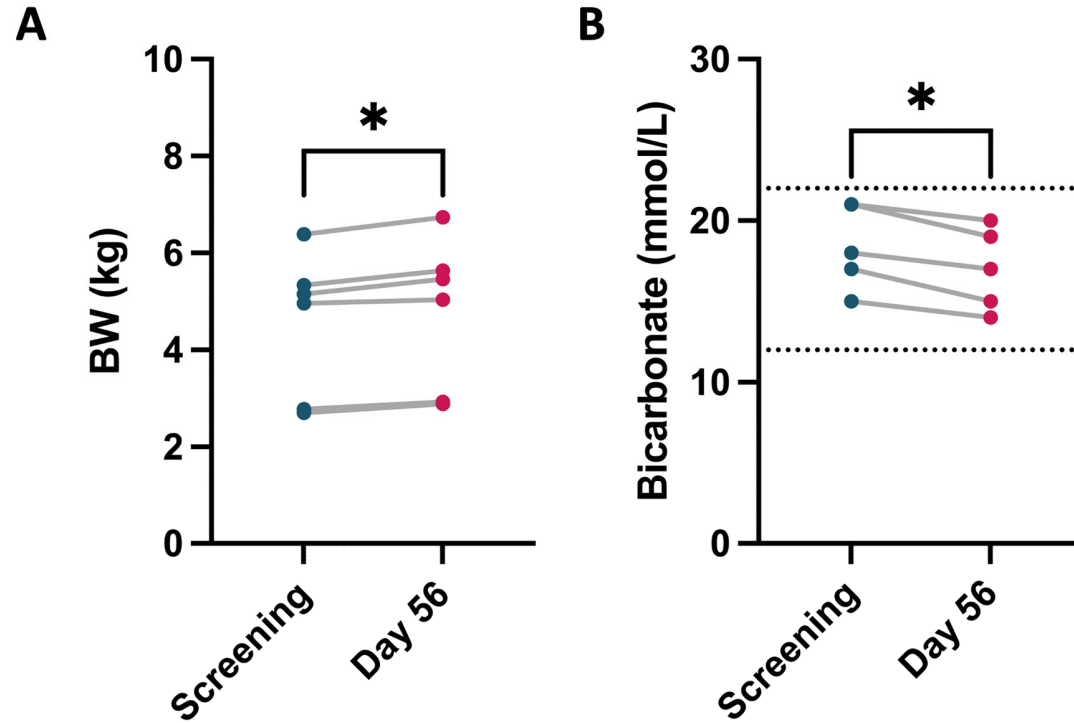

Supplemental Figure S3. Statistically significant physical exam and biochemistry variables. Data points depicting a statistically significant increase in BW (A) and a decrease in blood bicarbonate/total CO<sub>2</sub> levels (B) from pre- (teal) to post-treatment (pink) timepoints for pooled treatment groups (low- + high-dose) are shown ( $P<0.03$  and  $P<0.03$ , respectively). Normal reference range values (12-22mmol/L) for blood bicarbonate/total CO<sub>2</sub> are plotted (dotted lines). \* $P<0.05$ .

Abbreviations: BW = body weight.



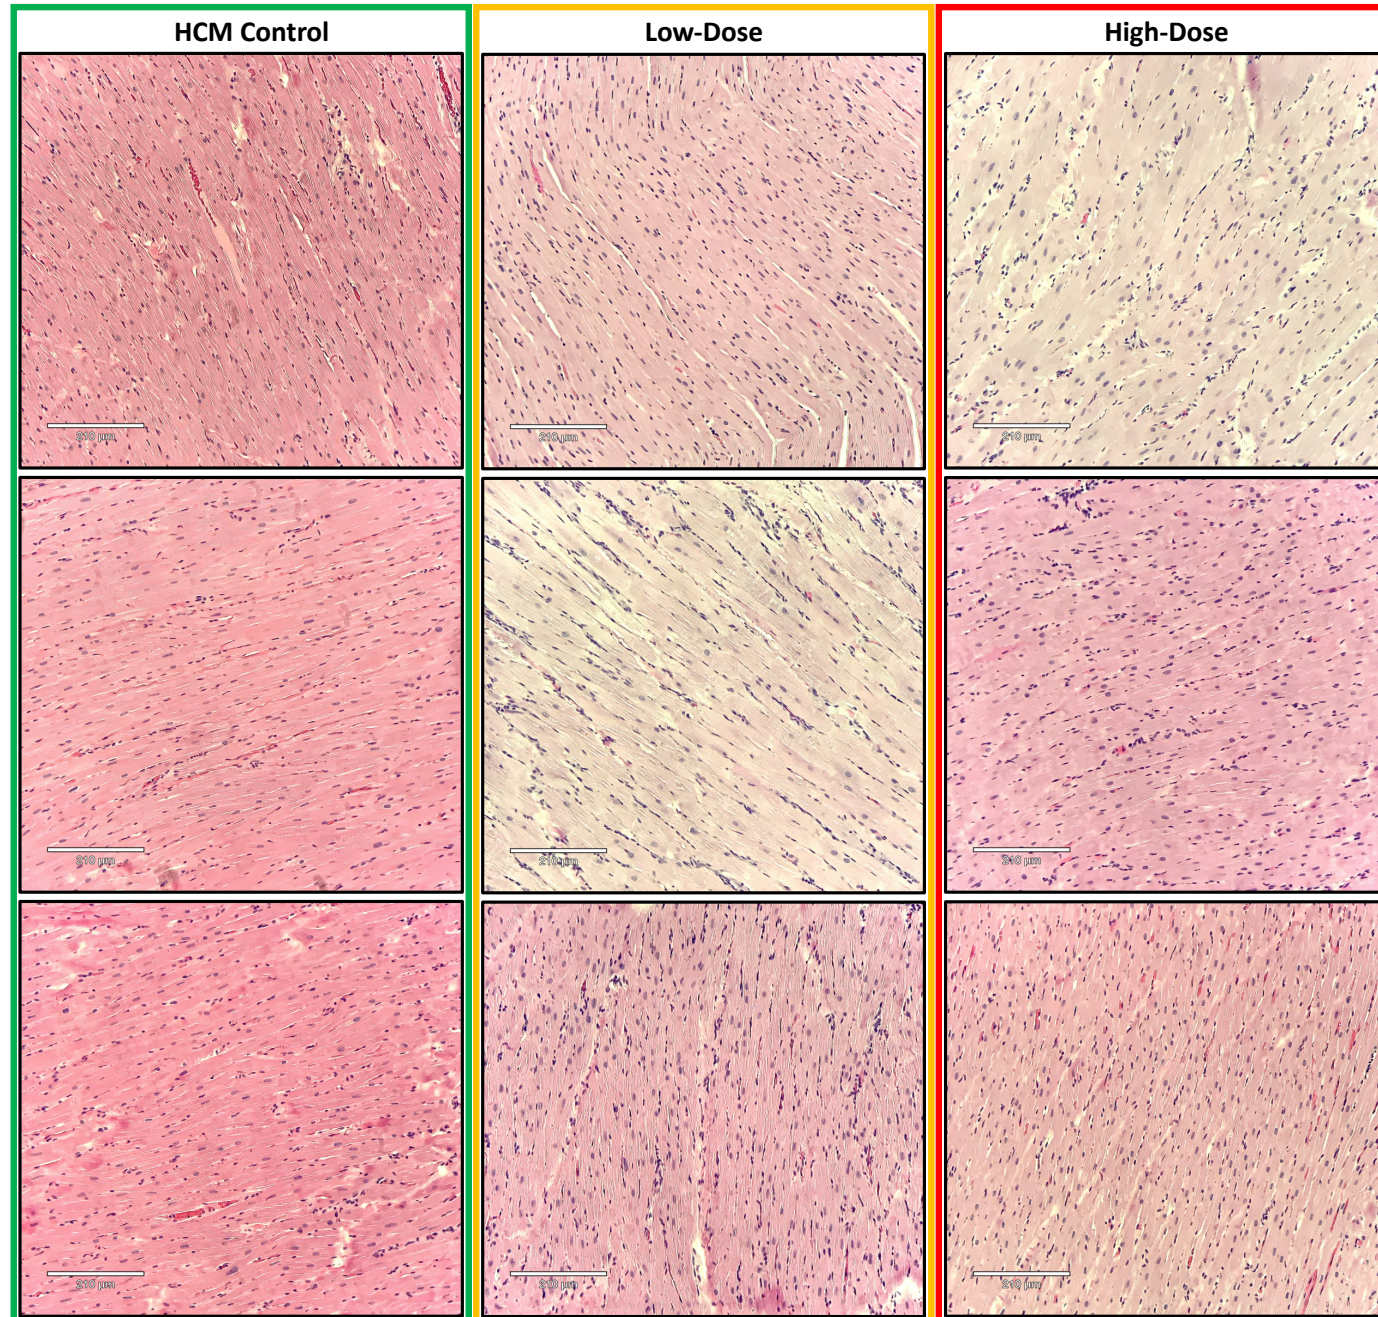



Supplemental Figure S4. Representative H&E staining of all nine study cats. Histopathologic hematoxylin and eosin (H&E) slide images via light microscopy for all three cats in the HCM control (green box), all three cats in the low-dose (yellow box), and all three cats in the high-dose group (red box) are provided. Images were obtained on the posterior wall of the LV adjacent to papillary muscles. White scale bar=210µm.  
Abbreviations: HCM = hypertrophic cardiomyopathy.

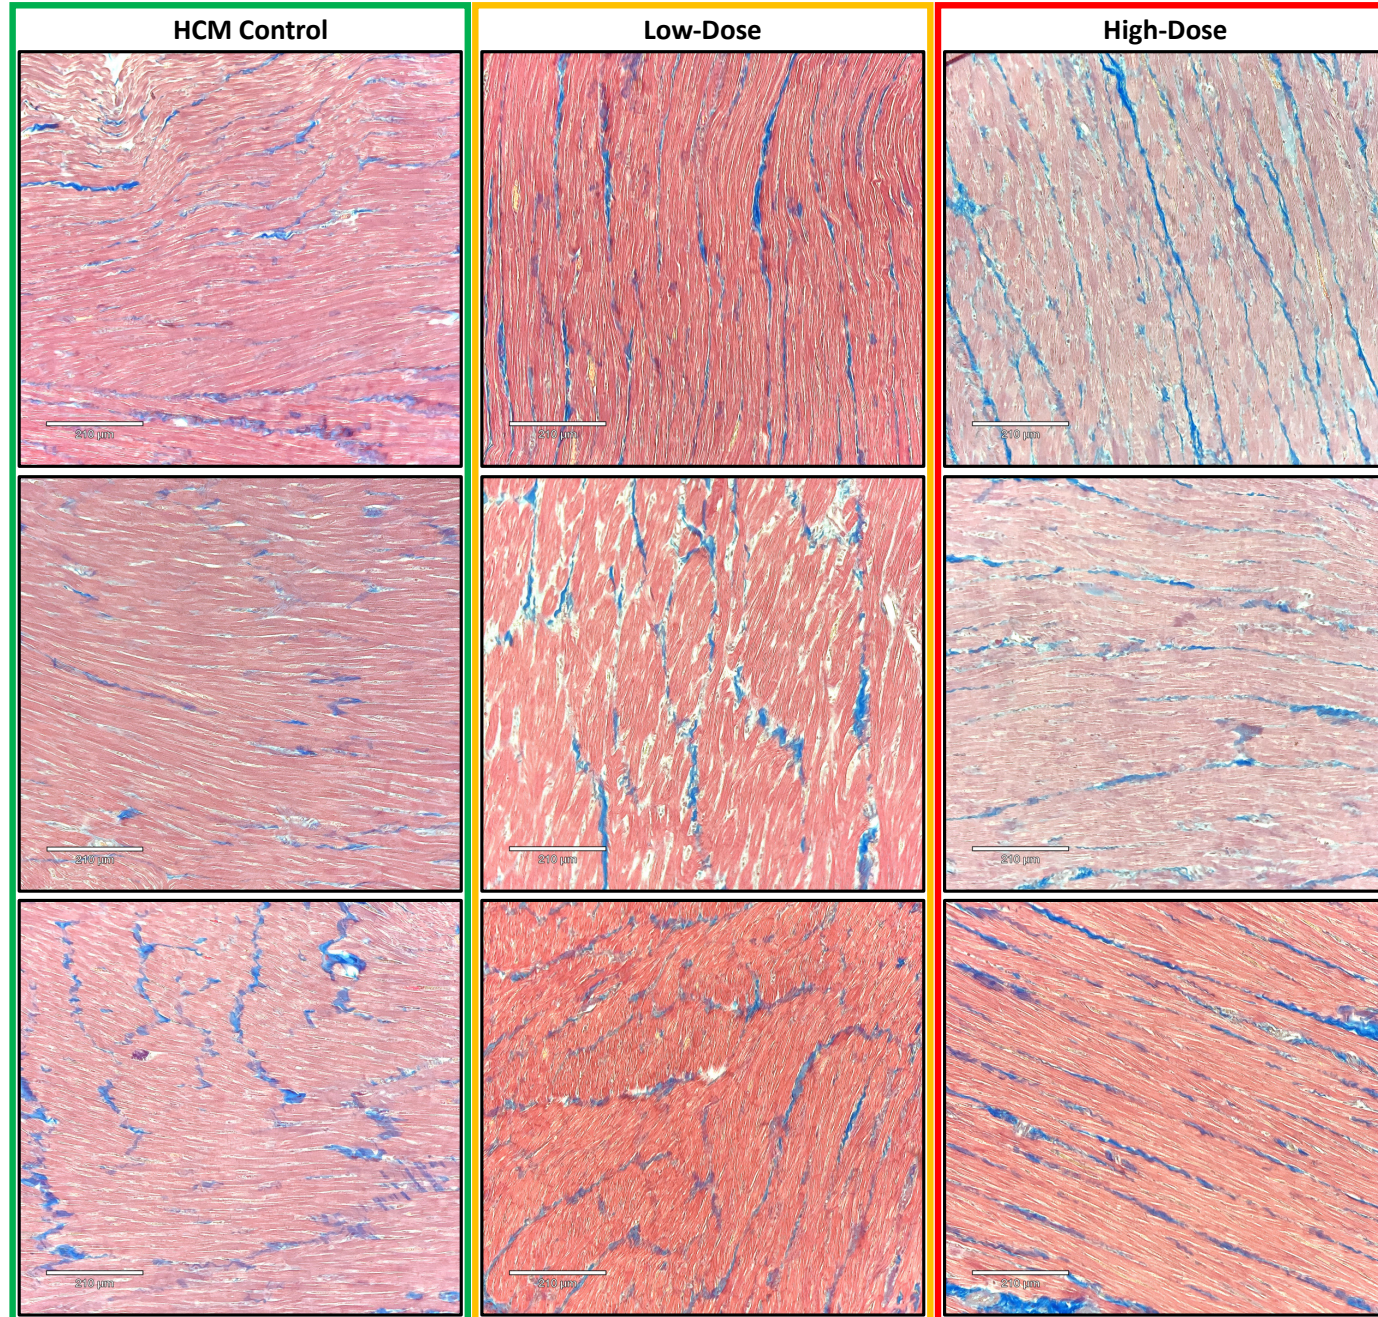

Supplemental Figure S5. Representative Masson's trichrome staining of all nine study cats. Histopathologic Masson's trichrome slide images via light microscopy for all three cats in the HCM control (green box), all three cats in the low-dose (yellow box), and all three cats in the high-dose group (red box) are provided. Images were obtained on the posterior wall of the LV adjacent to papillary muscles. White scale bar=210µm.  
Abbreviations: HCM = hypertrophic cardiomyopathy.

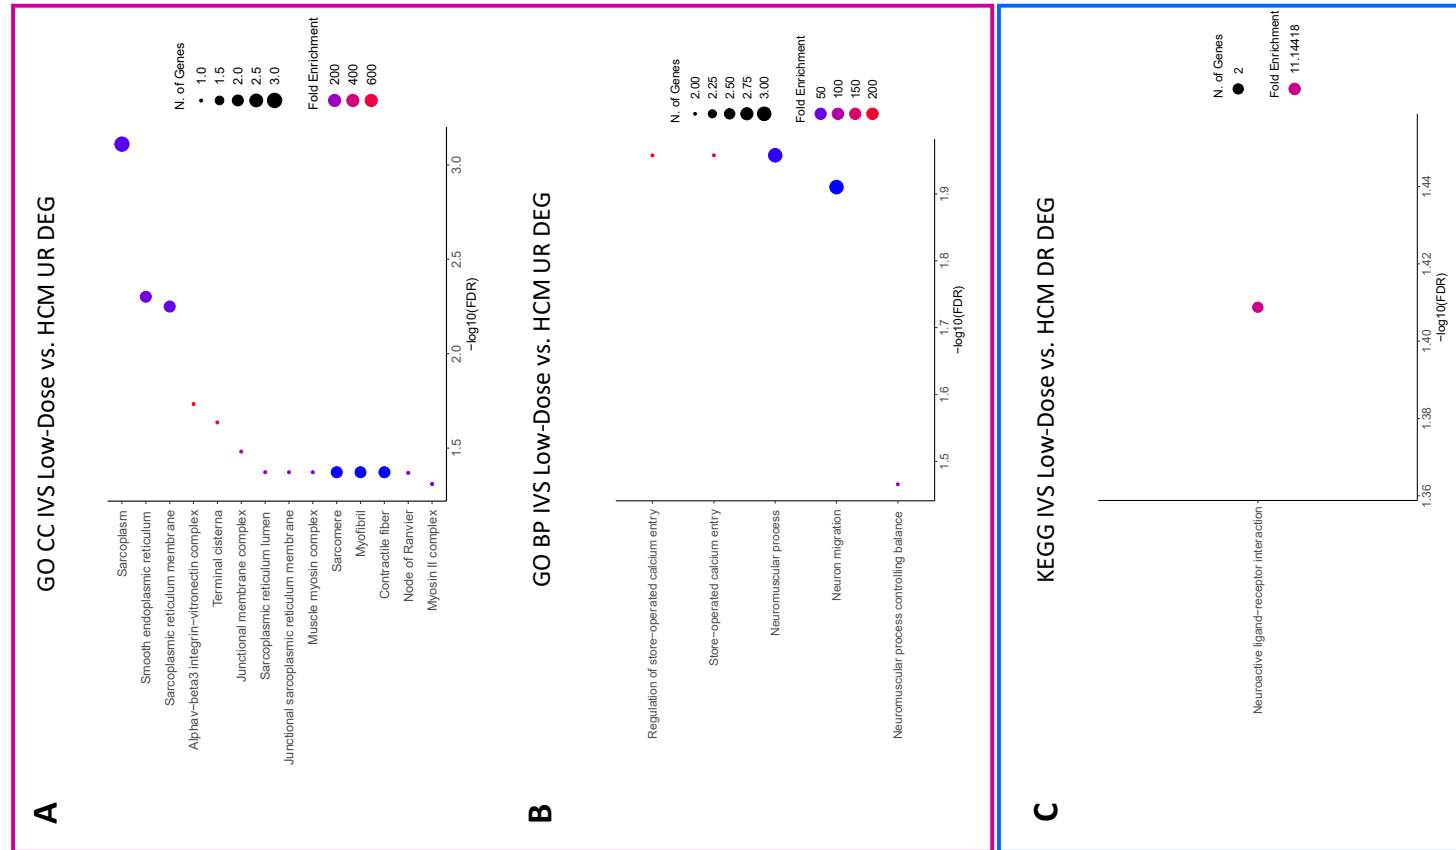

Supplemental Figure S6. Enriched terms for IVS DEGs in the low-dose vs HCM comparison. Enrichment plots for GO CC (A), GO BP (C), and KEGG pathway (C) term analyses are presented for down- (blue box) and upregulated (pink box) DEGs. The y-axis depicts identified enriched terms, whereas the x-axis depicts the terms' significance ( $-\log_{10}[\text{FDR}]$ ). Terms are sorted according to statistical significance; the top-most terms on the y-axis constitute the most statistically significant of terms. Size of individual points depict the total number of genes binned to a given enriched term; high or low fold enrichment is represented by red or blue coloring, respectively. Abbreviations: HCM = hypertrophic cardiomyopathy, IVS = interventricular septum, GO = gene ontology, CC = cellular components, BP = biological processes, UR = upregulated, DR = downregulated, DEG = differentially expressed gene(s).



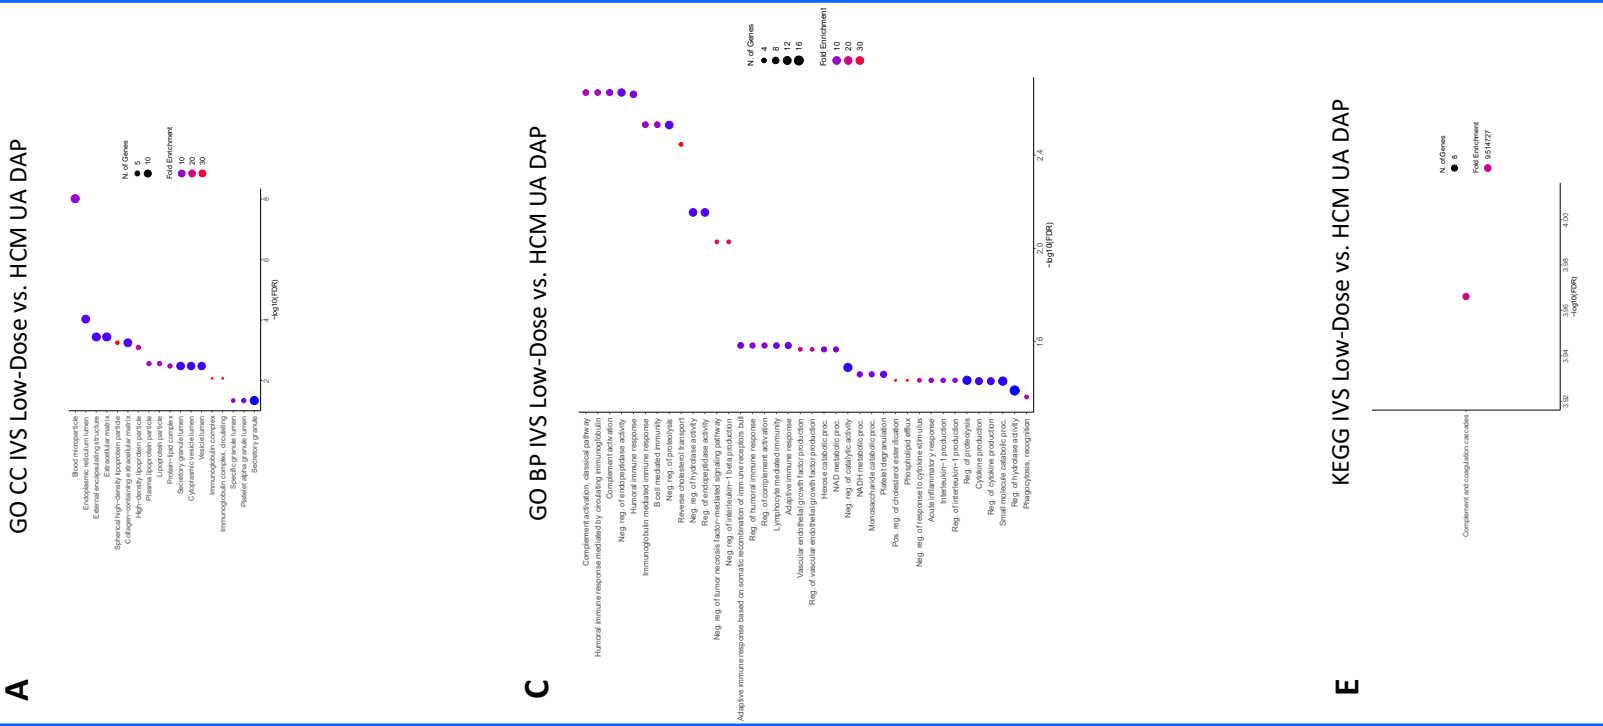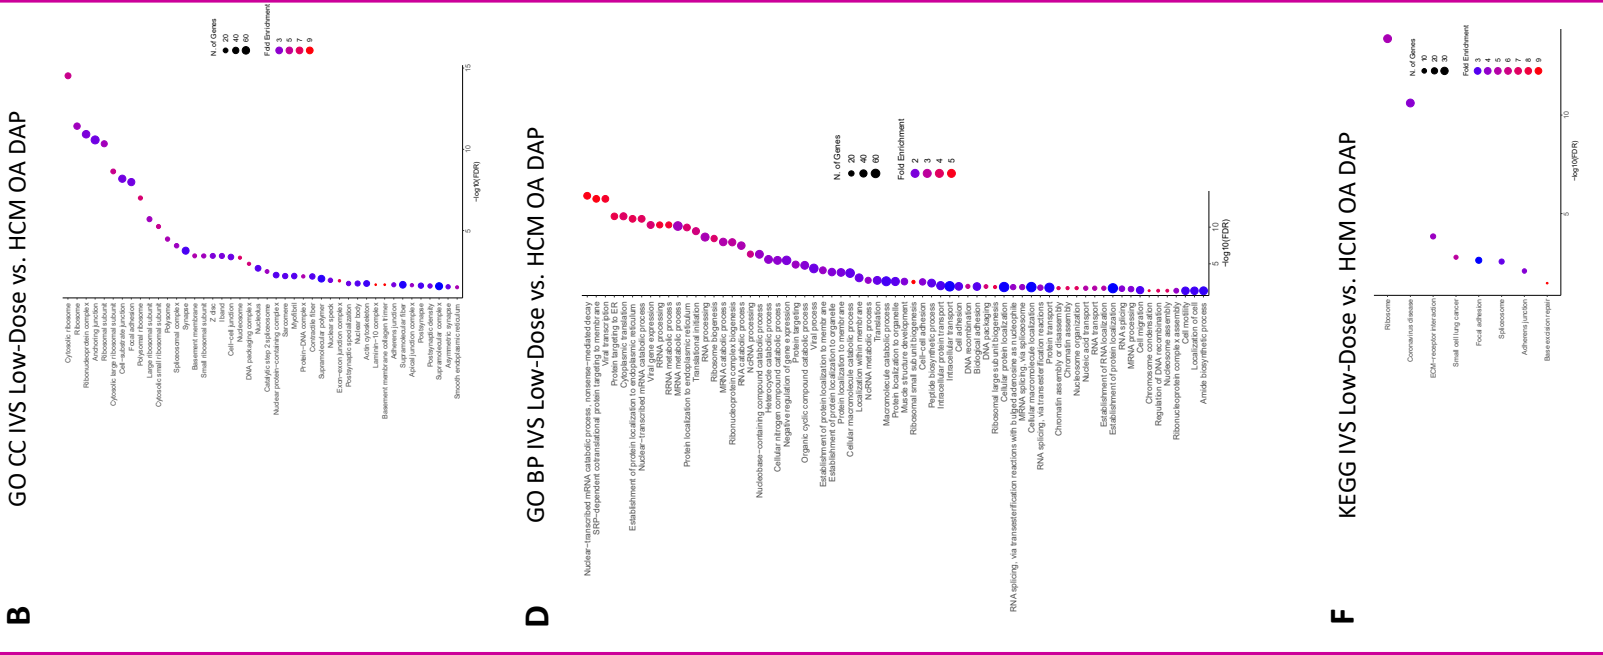

Supplemental Figure S7. Enriched terms for IVS DAPs in the low-dose vs HCM comparison. Enrichment plots for GO CC (A & B), GO BP (C & D), and KEGG pathway (E & F) term analyses are presented for under- (blue box) and overabundant (pink box) DAPs. The y-axis depicts identified enriched terms, whereas the x-axis depicts the terms' significance ( $-\log_{10}[\text{FDR}]$ ). Terms are sorted according to statistical significance; the top-most terms on the y-axis constitute the most statistically significant of terms. Size of individual points depict the total number of proteins binned to a given enriched term; high or low fold enrichment is represented by red or blue coloring, respectively.

Abbreviations: HCM = hypertrophic cardiomyopathy, IVS = interventricular septum, GO = gene ontology, CC = cellular components, BP = biological processes, UA = underabundant, OA = overabundant, DAP = differentially abundant peptide(s).

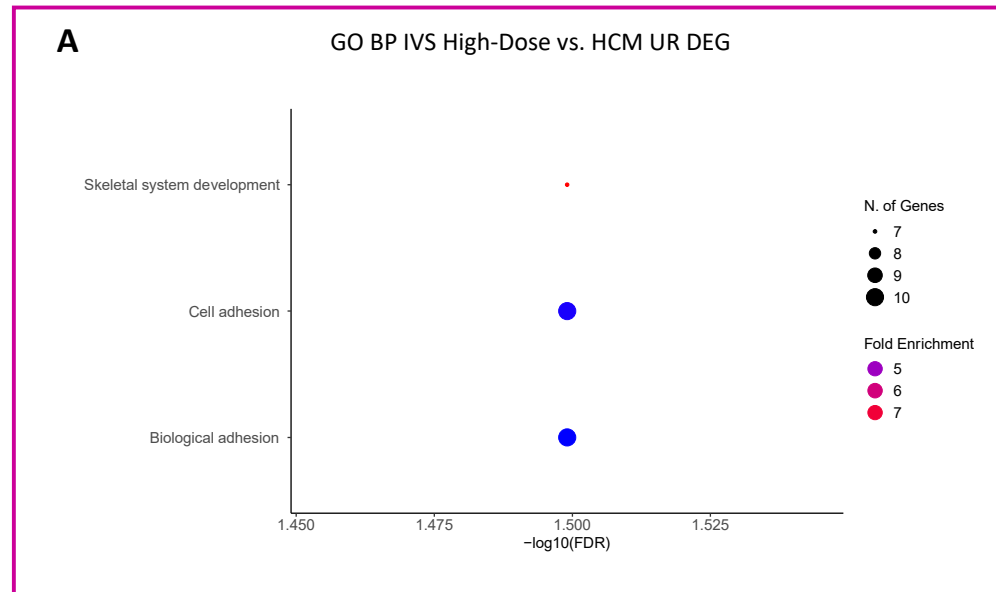

Supplemental Figure S8. Enriched terms for IVS DEGs in the high-dose vs HCM comparison. Enrichment plot for GO CC (A) term analysis are presented for upregulated (pink box) DEGs. The y-axis depicts identified enriched terms, whereas the x-axis depicts the terms' significance ( $-\log_{10}[\text{FDR}]$ ). Terms are sorted according to statistical significance; the top-most terms on the y-axis constitute the most statistically significant of terms. Size of individual points depict the total number of genes binned to a given enriched term; high or low fold enrichment is represented by red or blue coloring, respectively.

Abbreviations: HCM = hypertrophic cardiomyopathy, IVS = interventricular septum, GO = gene ontology, BP = biological processes, UR = upregulated, DEG = differentially expressed gene(s).

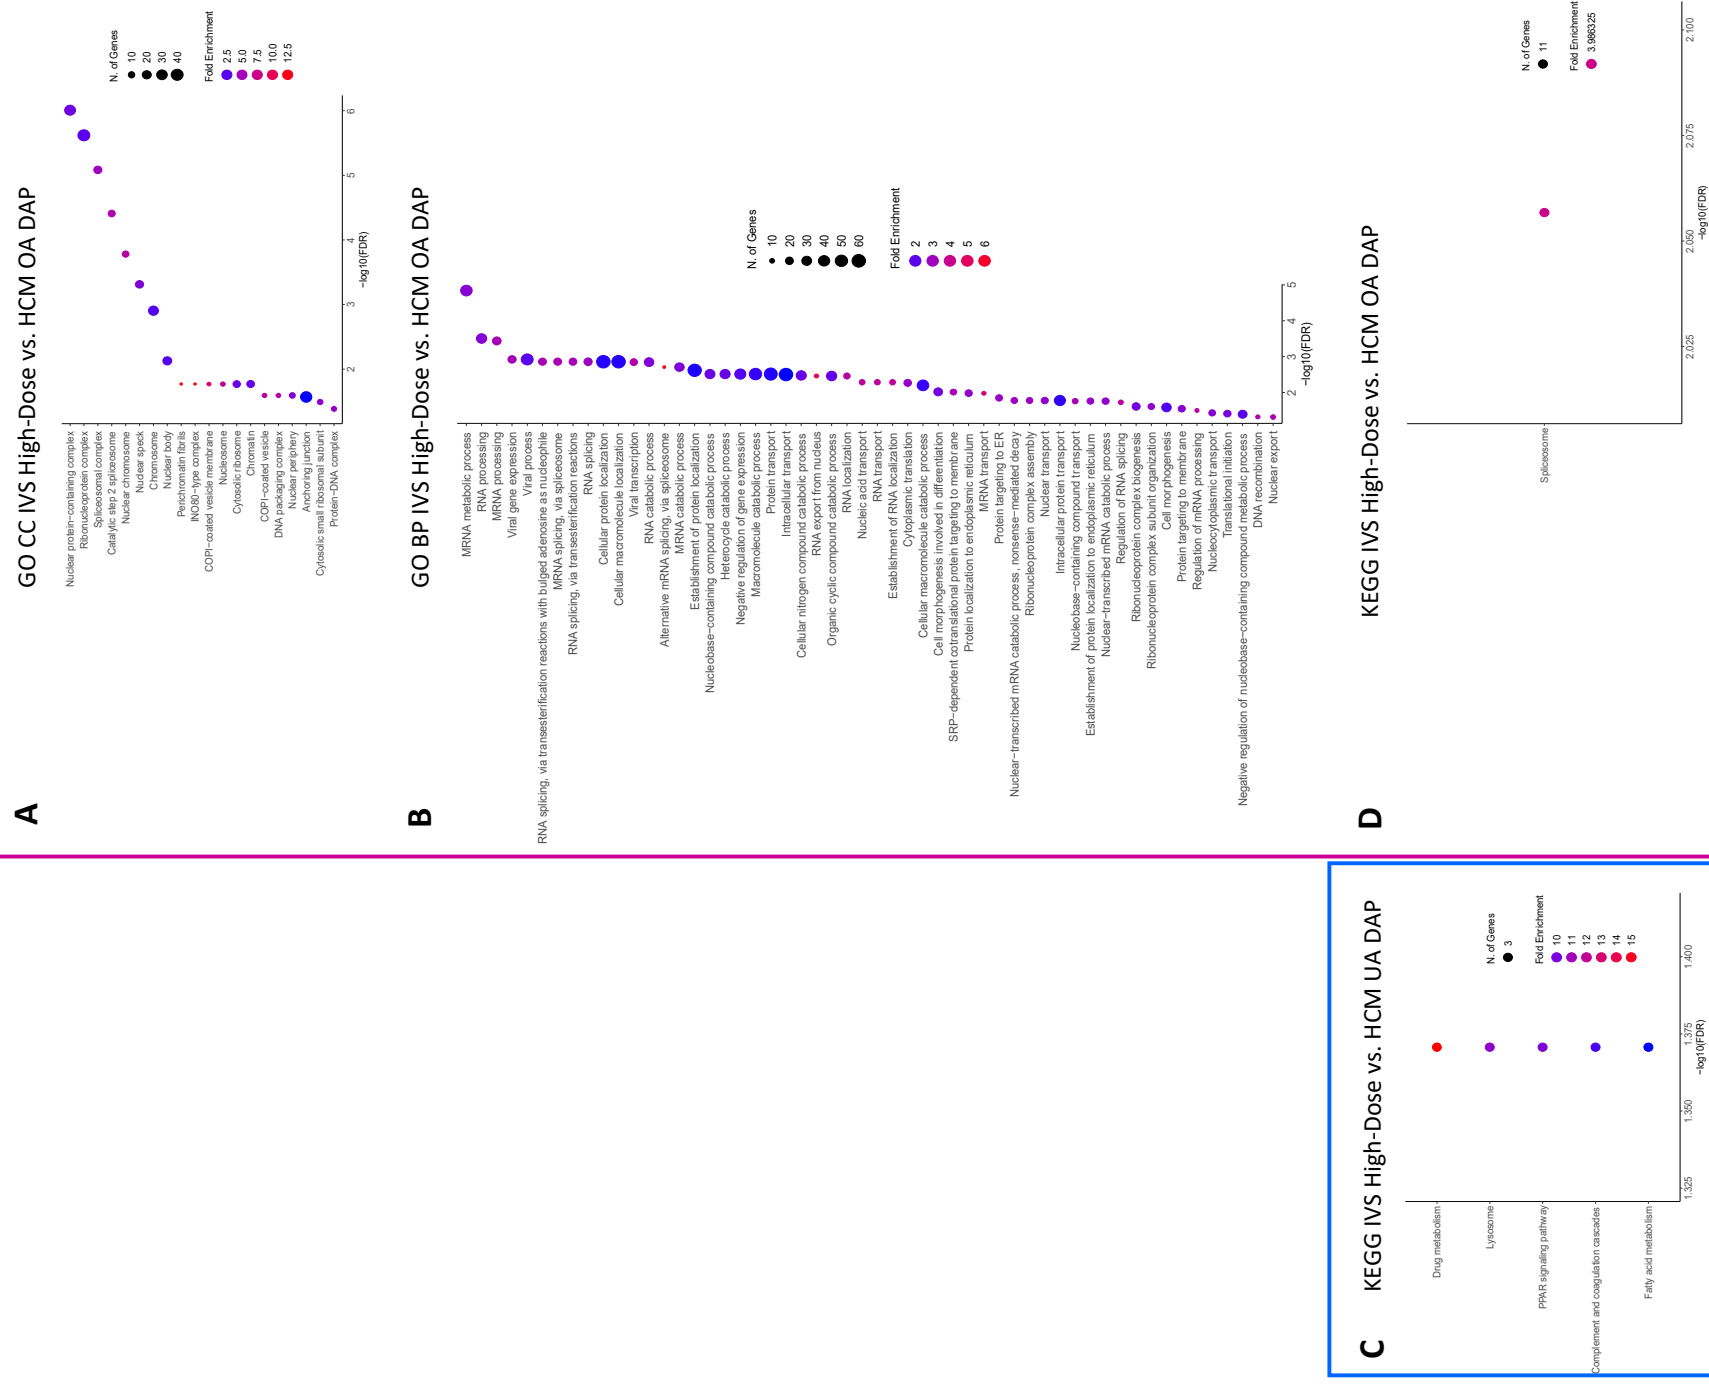



Supplemental Figure S9. Enriched terms for IVS DAPs in the high-dose vs HCM comparison. Enrichment plots for GO CC (A), GO BP (C), and KEGG pathway (C & D) term analyses are presented for under- (blue box) and overabundant (pink box) DAPs. The y-axis depicts identified enriched terms, whereas the x-axis depicts the terms' significance ( $-\log_{10}[\text{FDR}]$ ). Terms are sorted according to statistical significance; the top-most terms on the y-axis constitute the most statistically significant of terms. Size of individual points depict the total number of proteins binned to a given enriched term; high or low fold enrichment is represented by red or blue coloring, respectively.

Abbreviations: HCM = hypertrophic cardiomyopathy, IVS = interventricular septum, GO = gene ontology, CC = cellular components, BP = biological processes, UA = underabundant, OA = overabundant, DAP = differentially abundant peptide(s).

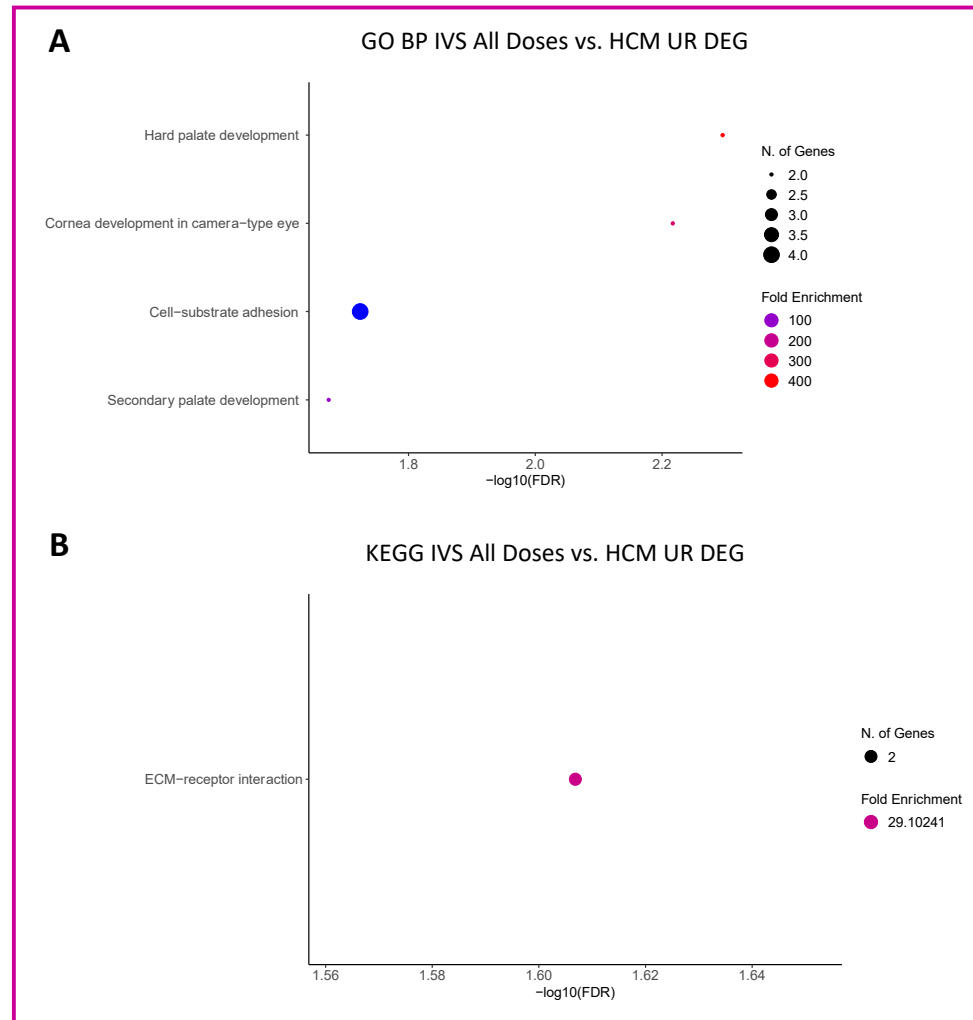

Supplemental Figure S10. Enriched terms for IVS DEGs in the pooled all dose vs HCM comparison. Enrichment plot for GO BP (A) and KEGG pathway (B) term analyses are presented for upregulated (pink box) DEGs. The y-axis depicts identified enriched terms, whereas the x-axis depicts the terms' significance ( $-\log_{10}[\text{FDR}]$ ). Terms are sorted according to statistical significance; the top-most terms on the y-axis constitute the most statistically significant of terms. Size of individual points depict the total number of genes binned to a given enriched term; high or low fold enrichment is represented by red or blue coloring, respectively.

Abbreviations: HCM = hypertrophic cardiomyopathy, IVS = interventricular septum, GO = gene ontology, BP = biological processes,  
UR = upregulated, DEG = differentially expressed gene(s).

**A** GO CC IVS All-Doses vs. HCM UA DAP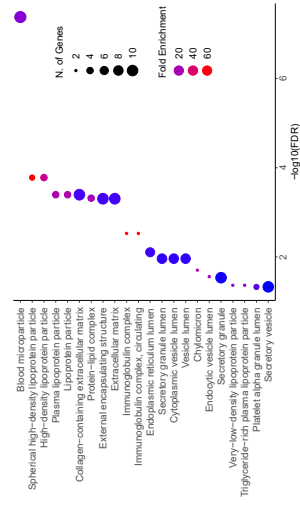**C** GO BP IVS All Doses vs. HCM UA DAP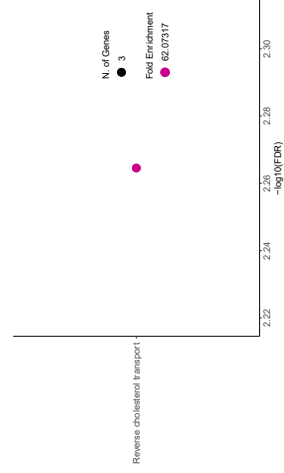**E** KEGG IVS All Doses vs. HCM UA DAP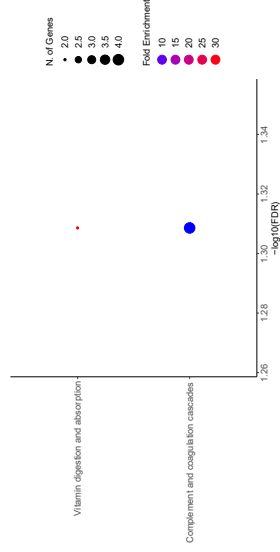**B** GO CC IVS All Doses vs. HCM OA DAP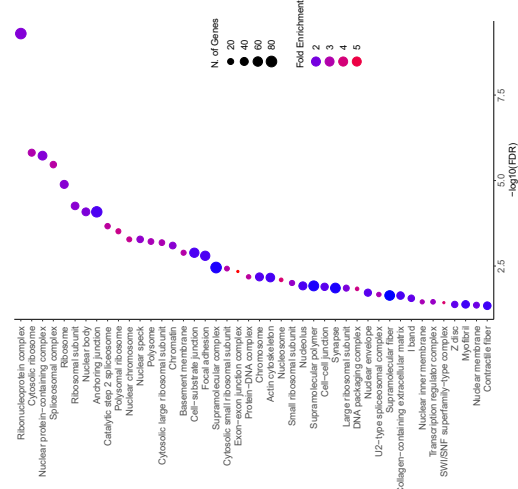**D** GO BP IVS All Doses vs. HCM OA DAP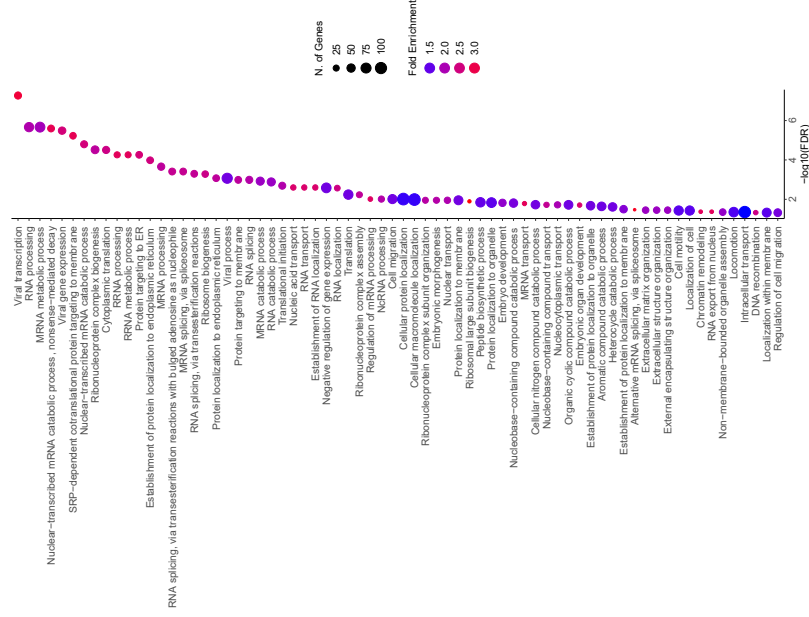**F** KEGG IVS All Doses vs. HCM OA DAP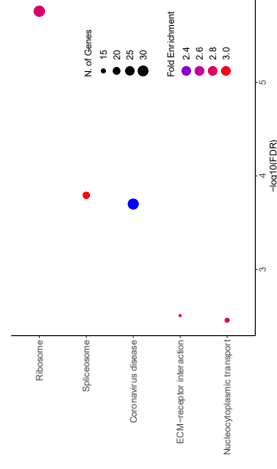

Supplemental Figure S11. Enriched terms for IVS DAPs in the pooled all doses vs HCM comparison. Enrichment plots for GO CC (A & B), GO BP (C & D), and KEGG pathway (E & F) term analyses are presented for under- (blue box) and overabundant (pink box) DAPs. The y-axis depicts identified enriched terms, whereas the x-axis depicts the terms' significance ( $-\log_{10}[\text{FDR}]$ ). Terms are sorted according to statistical significance; the top-most terms on the y-axis constitute the most statistically significant of terms. Size of individual points depict the total number of proteins binned to a given enriched term; high or low fold enrichment is represented by red or blue coloring, respectively.

Abbreviations: HCM = hypertrophic cardiomyopathy, IVS = interventricular septum, GO = gene ontology, CC = cellular components, BP = biological processes, UA = underabundant, OA = overabundant, DAP = differentially abundant peptide(s).

**A** GO CC Plasma All Doses Pre- vs. Post-Treatment OA DAP

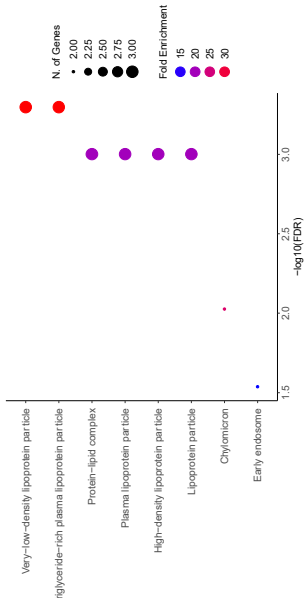

**B** GO BP Plasma All Doses Pre- vs. Post-Treatment OA DAP

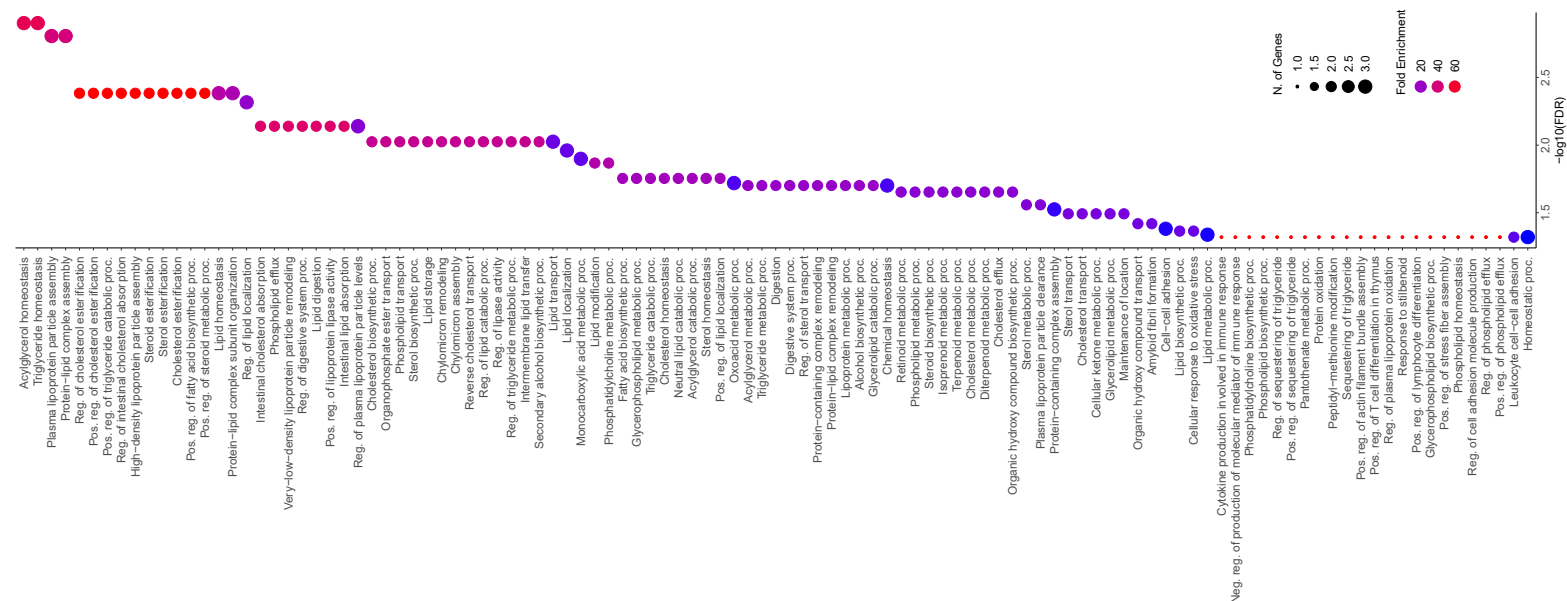

**C** KEGG Plasma All Doses Pre- vs. Post-Treatment OA DAP

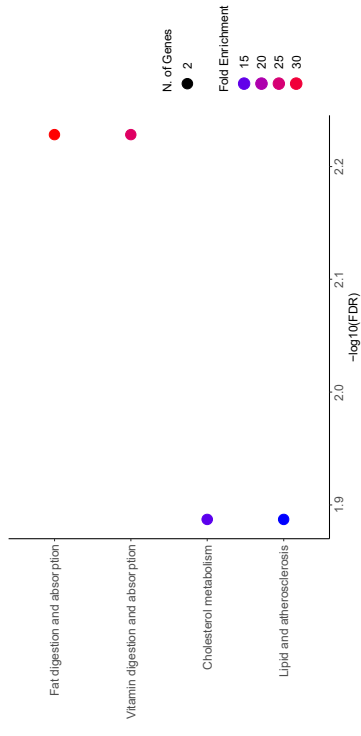

Supplemental Figure S12. Enriched terms for plasma pre- and post-treatment DAPs in the pooled all doses group. Enrichment plots for GO CC (A), GO BP (B), and KEGG pathway (C) term analyses are presented for overabundant (pink box) DAPs. The y-axis depicts identified enriched terms, whereas the x-axis depicts the terms' significance ( $-\log_{10}[\text{FDR}]$ ). Terms are sorted according to statistical significance; the top-most terms on the y-axis constitute the most statistically significant of terms. Size of individual points depict the total number of proteins binned to a given enriched term; high or low fold enrichment is represented by red or blue coloring, respectively. Abbreviations: GO = gene ontology, CC = cellular components, BP = biological processes, OA = overabundant, DAP = differentially abundant peptide(s).

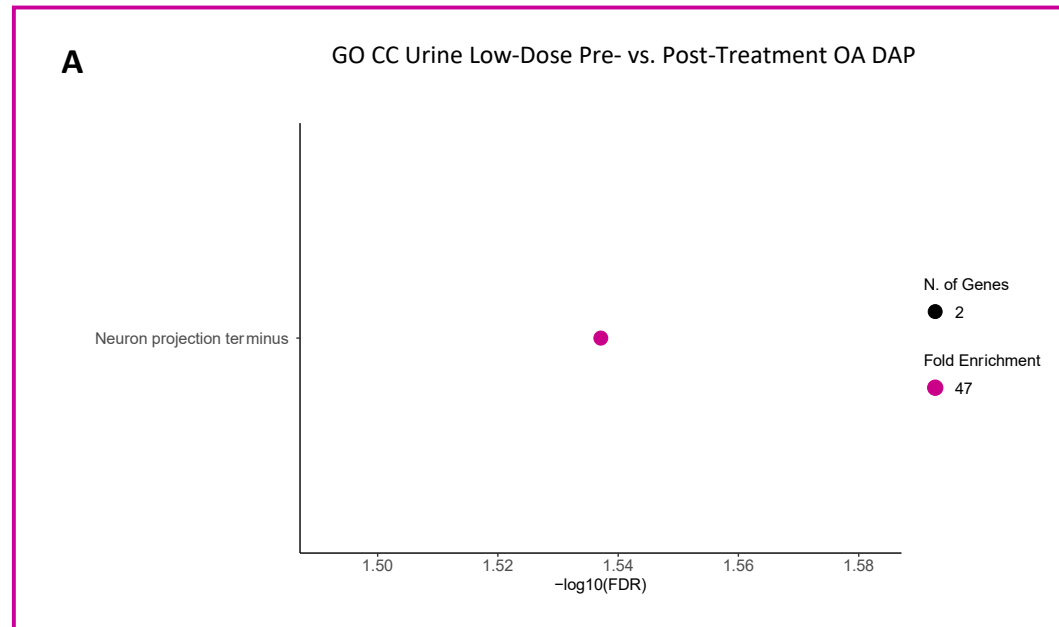

Supplemental Figure S13. Enriched term for urine pre- and post-treatment DAPs in the low-dose group. Enrichment plot for the GO CC (A) term analysis is presented for overabundant (pink box) DAPs. The y-axis depicts identified enriched terms, whereas the x-axis depicts the terms' significance ( $-\log_{10}[\text{FDR}]$ ). Size of individual points depict the total number of proteins binned to the given enriched term; high or low fold enrichment is represented by red or blue coloring, respectively.

Abbreviations: GO = gene ontology, CC = cellular components, OA = overabundant, DAP = differentially abundant peptide(s).



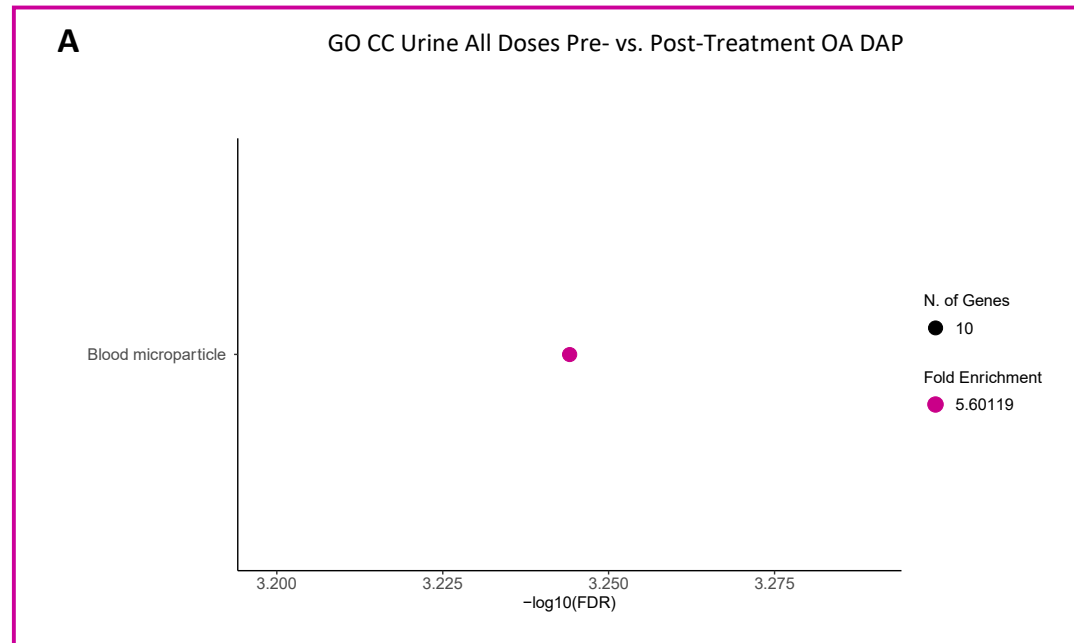

Supplemental Figure S14. Enriched term for urine pre- and post-treatment DAPs in the pooled all doses group. Enrichment plot for the GO CC (A) term analysis is presented for overabundant (pink box) DAPs. The y-axis depicts identified enriched terms, whereas the x-axis depicts the terms' significance ( $-\log_{10}[\text{FDR}]$ ). Terms are sorted according to statistical significance; the top-most terms on the y-axis constitute the most statistically significant of terms. Size of individual points depict the total number of proteins binned to the given enriched term; high or low fold enrichment is represented by red or blue coloring, respectively.

Abbreviations: GO = gene ontology, CC = cellular components, OA = overabundant, DAP = differentially abundant peptide(s).
